1 Unprecedented yet gradual nature of first millennium CE intercontinental  
2 crop plant dispersal revealed in ancient Negev desert refuse

3 Daniel Fuks<sup>1\*</sup>, Yoel Melamed<sup>2</sup>, Dafna Langgut,<sup>3</sup> Tali Erickson-Gini<sup>4</sup>, Yotam Tepper<sup>5,6</sup>, Guy  
4 Bar-Oz<sup>6</sup>, Ehud Weiss<sup>2</sup>

5 <sup>1</sup> McDonald Institute for Archaeological Research, Department of Archaeology, University of Cambridge,  
6 Cambridge CB2 3ER, UK

7 <sup>2</sup> Archaeobotany Lab, Martin (Szusz) Department of Land of Israel Studies and Archaeology, Bar-Ilan  
8 University, Ramat-Gan 5290002, Israel

9 <sup>3</sup> Laboratory of Archaeobotany and Ancient Environments, Institute of Archaeology & The Steinhardt Museum  
10 of Natural History, Tel Aviv University, Tel Aviv 69978, Israel

11 <sup>4</sup> Southern Region, Israel Antiquities Authority, Omer Industrial Park 84965, Israel

12 <sup>5</sup> Central Region, Israel Antiquities Authority, Tel-Aviv 61012, Israel

13 <sup>6</sup> School of Archaeology and Maritime Cultures, University of Haifa, Haifa 3498838, Israel

14 \* Corresponding author: [df427@cam.ac.uk](mailto:df427@cam.ac.uk)

15 ORCiDs

16 DF: <https://orcid.org/0000-0003-4686-6128>

17 DL: <https://orcid.org/0000-0002-4824-1044>

18 GBO: <https://orcid.org/0000-0002-1009-5619>

19 EW: <https://orcid.org/0000-0002-9730-4726>

20 YT: <https://orcid.org/0000-0002-5564-1652>

21

22 *Abstract*

23 Global agro-biodiversity has resulted from processes of plant migration and agricultural  
24 adoption. Although critically affecting current diversity, crop diffusion from antiquity to the  
25 middle-ages is poorly researched, overshadowed by studies on that of prehistoric periods. A  
26 new archaeobotanical dataset from three Negev Highland desert sites demonstrates the first  
27 millennium CE's significance for long-term agricultural change in southwest Asia. This  
28 enables evaluation of the "Islamic Green Revolution" (IGR) thesis compared to "Roman  
29 Agricultural Diffusion" (RAD), and both versus crop diffusion since the Neolithic. Among  
30 the finds, some of the earliest *Solanum melongena* seeds in the Levant represent the proposed  
31 IGR. Several other identified economic plants, including two unprecedented in Levantine  
32 archaeobotany (*Ziziphus jujuba*, *Lupinus albus*), implicate RAD as the greater force for crop  
33 migrations. Altogether the evidence supports a gradualist model for Holocene-wide crop

34 diffusion, within which the first millennium CE contributed more to global agro-diversity  
35 than any earlier period.

### 36 *Introduction*

37 Crop diversity has long been recognized as key to sustainable agriculture and global food  
38 security, encompassing genetic resources for agricultural crop improvement geared at  
39 improving yields, pest resistance, climate change resilience, and the promotion of cultural  
40 heritage. Global genetic diversity of agricultural crops is a product of their dispersal from  
41 multiple regions and much research has attempted to reconstruct these trajectories [1-3]. As  
42 part of this effort, archaeobotanical research on plant migrations across the Eurasian  
43 continent has been a central theme in recent decades, especially with reference to “food  
44 globalization” and the “Trans-Eurasian exchange” [4-8]. Yet, as is true for archaeology-based  
45 domestication research in general, most studies of crop dispersal and exchange have focused  
46 on prehistoric origins and developments, to the near exclusion of more recent crop histories  
47 directly affecting today’s agricultural diversity [9-15]. One of the most influential, and  
48 contested, chapters in the later history of crop diffusion is the ‘Islamic Green Revolution’  
49 (IGR) [16,17]. According to Andrew Watson, the IGR involved a package of sub-/tropical,  
50 mostly east- and south Asian domesticates which, as a result of the Islamic conquests, spread  
51 into Mediterranean lands along with requisite irrigation technologies ca. 700–1100 CE. This  
52 allegedly involved some 17 domesticated plant taxa (**Supplementary Table 1**), including  
53 such economically significant crops as sugar cane, orange and banana [16]. However, critics  
54 have argued that many of the proposed IGR crops were, and still are, of minor economic  
55 significance, while others were previously cultivated in the Mediterranean region, particularly  
56 under Roman rule, or else arrived much later [17-19]. Indeed, there is considerable evidence  
57 for crop diffusion immediately preceding and during the Roman period in the eastern  
58 Mediterranean, 1<sup>st</sup> c. BCE– 4<sup>th</sup> c. CE. During this time, several east- and central Asian crops,  
59 including some of those on Watson’s IGR list, were introduced to the Mediterranean region,  
60 along with agricultural technologies [17-21]. From this period on, a growing fruit basket is  
61 evident in sites and texts of the eastern Mediterranean region [22-25]. These include several  
62 tree-fruits (**Supplementary Table 2**) apparently reflecting the Greco-Roman passion for  
63 grafting and its pivotal role in the dispersal of temperate fruit crops from Central Asia to the  
64 Mediterranean and Europe [3,26]. Yet Roman arboricultural diffusion is but a subset of  
65 Roman agricultural diffusion (hereafter, RAD), which also includes non-arboreal crops  
66 (including cannabis, muskmelon, white lupine, rice, sorghum) and various agricultural

67 techniques diffused by the Romans into the eastern Mediterranean [21,27-35]. Not all crops  
68 in motion during this period took hold in local agriculture. In some cases, as has been claimed  
69 for rice in Egypt, initial Roman-period importation of the new crops ultimately led to local  
70 cultivation in the Islamic period [36]. In other cases, Roman introductions were subsequently  
71 abandoned [37], or failed to diffuse beyond elite gardens until much later [38]. Limited  
72 adoption in local agriculture is also a feature of some proposed IGR crops, as Watson  
73 admitted regarding coconut and mango [16]. Thus, a cursory consideration of proposed IGR  
74 and RAD crops in the eastern Mediterranean reveals that the balance between the two is  
75 about even and perhaps weighted toward RAD (**Supplementary Tables 1-2**). This sort of  
76 comparison is valuable for evaluating the IGR thesis and attaining improved understandings  
77 of crop exchange and dispersal in the first millennium CE, but a higher-resolution micro-  
78 regional approach is needed to rigorously gauge these developments. Systematic evaluation  
79 of relative Islamic and Roman contributions to agricultural dispersal has been attempted for  
80 Iberia [35,39]. In the eastern Mediterranean, archaeobotanical studies in Egypt [36], northern  
81 Syria [40], and Jerusalem [25,41-42] have also yielded evidence for IGR introductions  
82 framed against Roman agricultural diffusion, but these have not yet been considered  
83 holistically.

84 The exceedingly rich plant remains from relatively undisturbed Negev Highland middens  
85 (**Fig. 1-2**; [43-45]) provide a significant new addition to the evidence for Levantine and  
86 Mediterranean crop diffusion, informing upon changes in the local economic plant basket  
87 over the 1<sup>st</sup> millennium CE. The Negev Highlands also offer an ideal test case for the  
88 geographical extent of crop dispersal, as a desert region on the margins of the settled zone,  
89 which practiced vibrant runoff farming and engaged in Mediterranean and Red Sea trade  
90 networks of Late Antiquity [46-50]. Archaeobotanical finds from the Negev Highlands,  
91 mainly from Byzantine sites (5<sup>th</sup>-7<sup>th</sup> centuries CE), have been reported in previous studies  
92 [43-44,51-59], including those deriving from organically rich middens at Elusa, Shivta, and  
93 Nessana, excavated as part of the recent NEGEVBYZ project [53-59]. We present below the  
94 first complete dataset of identified plant remains from the Late Antique Negev Highland  
95 middens dated to the local Roman, Byzantine and early Islamic periods (2<sup>nd</sup>-8<sup>th</sup> centuries  
96 CE). We then analyze this data to assess the evidence for Roman and Early Islamic crop  
97 diffusion in the southern Levant, comparing with earlier introductions. These include the  
98 southwest Asian Neolithic ‘founder crops’, Chalcolithic-Early Bronze Age tree fruit

99 domesticates, and Bronze-Iron Age introductions (**Supplementary Tables 1-3**). This analysis  
100 offers Holocene-scale insights on the dynamics of crop diffusion.

101 *Figure 1. Study sites and middens*

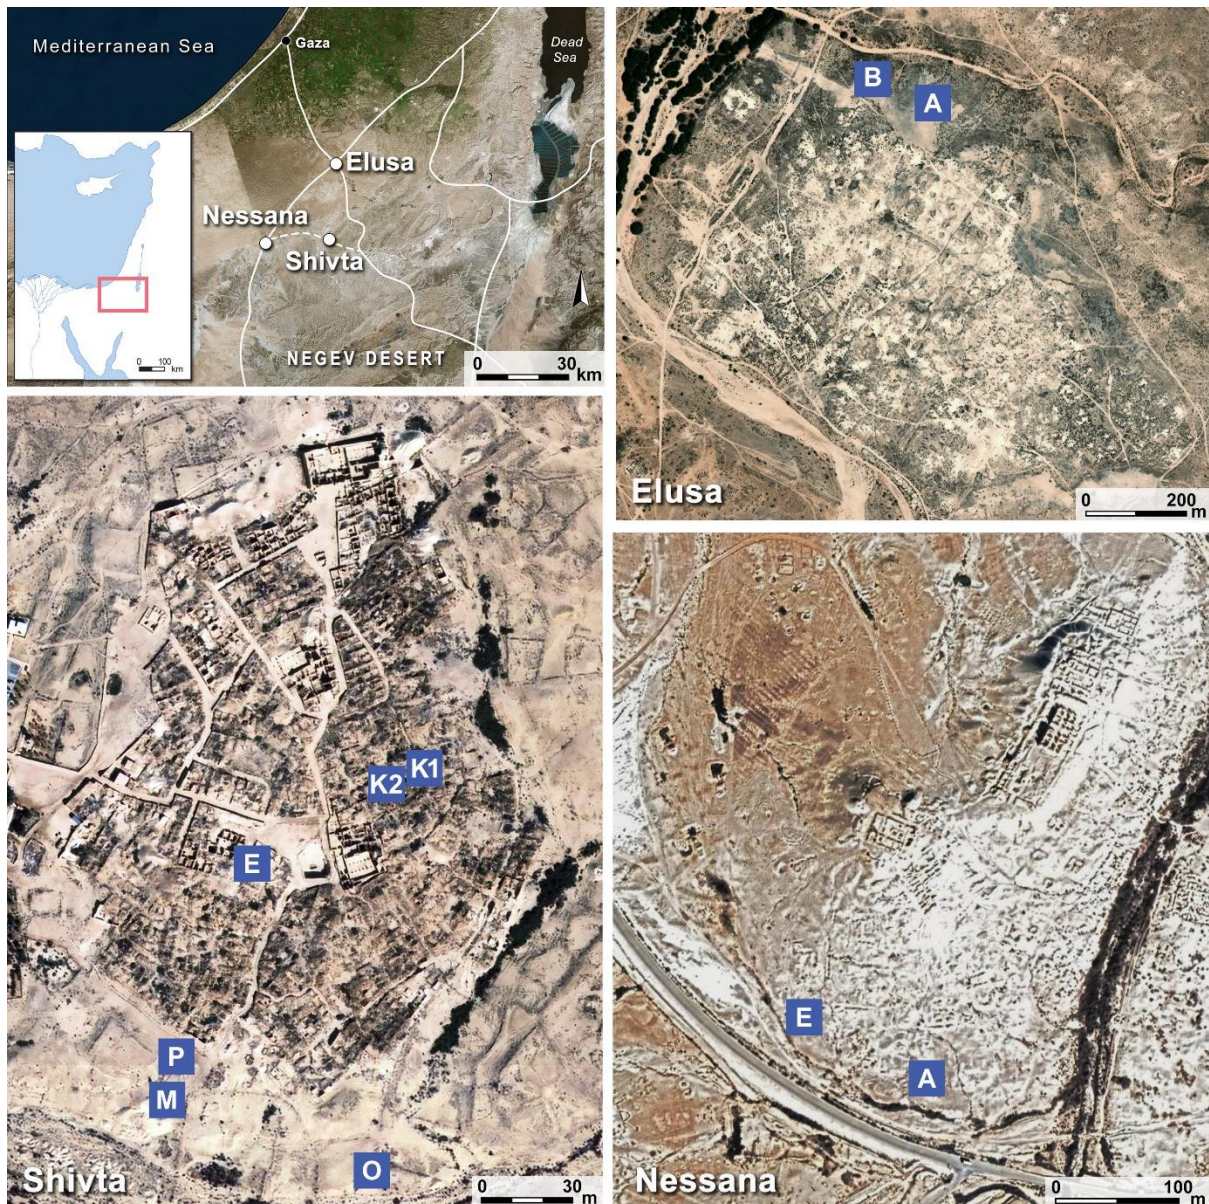

102

103 *The study sites – Shivta, Elusa and Nessana – roughly span the Negev Highlands region of the Negev desert.*  
104 *The excavated middens are marked on the aerial photos above. Middens are lettered as named in the 2015-2017*  
105 *excavations (see also Table 2).*

106

### 107 *Results*

108 Roughly 50,000 quantifiable macroscopic plant parts were retrieved from fine-sifted flotation  
109 and dry-sieved sediment samples of the middens of Elusa, Shivta and Nessana, excluding  
110 charcoal and in addition to a roughly equal number retrieved from wet-sieving (see  
111 **Supplementary Information**). These mostly carpological remains were identified to a total

112 144 distinct plant taxa (**Supplementary Table 4**). Nearly half of the identified specimens  
113 derived from six Shivta middens; one quarter from three Elusa middens and one quarter from  
114 two Nessana middens. Preservation quality varied somewhat within and between middens  
115 and samples, but all middens yielded rich concentrations of charred seeds and other organic  
116 remains, including many exceptionally preserved specimens. Identified species were  
117 classified as either domestic or wild and the former grouped by functional category  
118 (**Supplementary Table 4**). Most of the 120 wild taxa have ethnographically documented  
119 uses, whether for forage or fodder, crafts or fuel, food or spice, medicine or recreation.  
120 Nearly all of them grow wild in the Negev Highlands today and we cannot determine for  
121 certain which were deliberately used on site. Twenty-three domesticated food plant types  
122 were identified, including cereals, legumes, fruits, nuts, and one vegetable. Like the other  
123 domesticates, we consider the presence of Nile acacia (*Vachellia nilotica* [L.] Willd. ex  
124 Delile) in the assemblage to be the result of deliberate import or cultivation, along with other  
125 exotic trees previously identified by charcoal and pollen from the study sites. We focus on  
126 these 24 plants as indicators of local foodways and global crop diffusion. Their  
127 presence/absence by period in the Negev Highland middens appears in **Table 1**, and orders of  
128 magnitude by midden context for fine-sifted archaeobotanical samples appear in **Table 2** (see  
129 **Supplementary Information** for sifting and sampling strategy). The latter enable  
130 categorization of the Late Antique Negev Highland domesticates as staples, cash crops, and  
131 luxury/supplementary foods, setting the stage for analysis of the local manifestation of long-  
132 term crop diffusion. This analysis is further augmented by identified charcoal and pollen data  
133 from the study sites (**Supplementary Tables 5-6**) which raise the number of distinct plant  
134 taxa identified in the NEGEVBYZ project to over 180. Among the charcoal/pollen taxa not  
135 identified by seed and fruit remains are three fruit trees: sycamore fig (*Ficus sycomorus* L.),  
136 doum palm (*Hyphaene thebaica* [L.] Mart.), and hazelnut (*Corylus* sp.).

137 **Figure 2. First finds from the Negev Highlands middens**

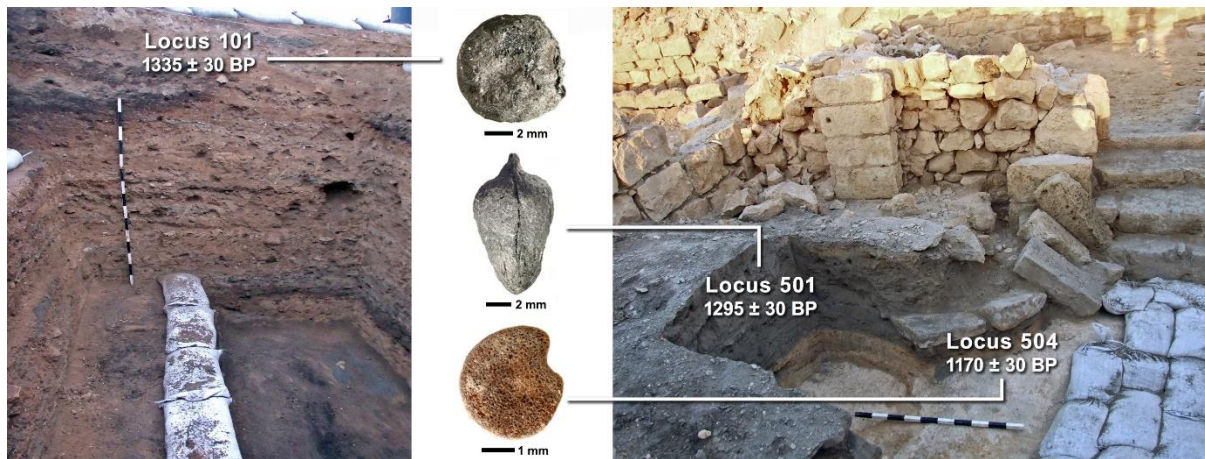

138  
 139 Section photos of Nessana midden A (left) and Shivta midden E (right) are shown with select Loci and their  
 140 uncalibrated radiocarbon dates (photographed by: Yotam Tepper), from which seeds of *Lupinus albus* (center  
 141 top), *Ziziphus jujuba* (center middle), *Solanum melongena* (center bottom) were found. These seeds represent  
 142 some of the earliest of their species found in the southern Levant (photographed by Daniel Fuks).

143

144 **Table 1. Presence/absence of domesticated species in Negev Highland middens by period**  
 145 (carpological remains)

| Plants/centuries CE        |                                             | 1 <sup>st</sup> -3 <sup>rd</sup> | 4 <sup>th</sup> -mid-5 <sup>th</sup> | mid-5 <sup>th</sup> -mid-6 <sup>th</sup> | mid-6 <sup>th</sup> -mid-7 <sup>th</sup> | 7 <sup>th</sup> | mid-7 <sup>th</sup> -8 <sup>th</sup> |
|----------------------------|---------------------------------------------|----------------------------------|--------------------------------------|------------------------------------------|------------------------------------------|-----------------|--------------------------------------|
| <b>Functional category</b> | <b>Latin name</b>                           |                                  |                                      |                                          |                                          |                 |                                      |
| <b>Cereals</b>             | <i>Hordeum vulgare</i>                      | ✓                                | ✓                                    | ✓                                        | ✓                                        | ✓               | ✓                                    |
|                            | <i>Triticum turgidum</i> s.l.               | ✓                                | ✓                                    | ✓                                        | ✓                                        | ✓               | ✓                                    |
|                            | <i>Triticum aestivum</i>                    |                                  |                                      |                                          | ✓                                        | ✓               | ✓                                    |
| <b>Legumes</b>             | <i>Lens culinaris</i>                       | ✓                                | ✓                                    | ✓                                        | ✓                                        | ✓               | ✓                                    |
|                            | <i>Vicia ervilia</i>                        | ✓                                | ✓                                    | ✓                                        | ✓                                        | ✓               | ✓                                    |
|                            | <i>Vicia faba</i>                           |                                  |                                      |                                          |                                          | ✓               | ✓                                    |
|                            | <i>Lathyrus clymenum</i>                    |                                  |                                      |                                          |                                          | ✓               | ✓                                    |
|                            | <i>Lupinus albus</i>                        |                                  |                                      |                                          |                                          | ✓               |                                      |
|                            | <i>Trigonella foenum-graecum</i>            |                                  | ✓                                    |                                          |                                          | ✓               | ✓                                    |
| <b>Fruits</b>              | <i>Vitis vinifera</i>                       | ✓                                | ✓                                    | ✓                                        | ✓                                        | ✓               | ✓                                    |
|                            | <i>Ficus carica</i>                         | ✓                                | ✓                                    | ✓                                        | ✓                                        | ✓               | ✓                                    |
|                            | <i>Olea europaea</i>                        | ✓                                | ✓                                    | ✓                                        | ✓                                        | ✓               | ✓                                    |
|                            | <i>Phoenix dactylifera</i>                  | ✓                                | ✓                                    | ✓                                        | ✓                                        | ✓               | ✓                                    |
|                            | <i>Punica granatum</i>                      |                                  | ✓                                    | ✓                                        | ✓                                        | ✓               | ✓                                    |
|                            | <i>Ceratonia siliqua</i>                    |                                  | ✓                                    |                                          | ✓                                        | ✓               | ✓                                    |
|                            | <i>Prunus persica</i>                       |                                  | ✓                                    |                                          | ✓                                        | ✓               | ✓                                    |
|                            | <i>Prunus</i> subgen. <i>Cerasus/Prunus</i> |                                  |                                      |                                          |                                          |                 | ✓                                    |
|                            | <i>Ziziphus jujuba</i>                      |                                  |                                      |                                          |                                          |                 | ✓                                    |
| <b>Nuts</b>                | <i>Prunus amygdalus</i>                     |                                  |                                      |                                          | ✓                                        | ✓               | ✓                                    |
|                            | <i>Pinus pinea</i>                          |                                  |                                      |                                          |                                          | ✓               | ✓                                    |
|                            | <i>Pistacia vera</i>                        |                                  |                                      |                                          |                                          |                 | ✓                                    |
|                            | <i>Juglans regia</i>                        |                                  |                                      |                                          |                                          |                 | ✓                                    |
| <b>Vegetable</b>           | <i>Solanum melongena</i>                    |                                  |                                      |                                          |                                          | ✓               | ✓                                    |
| <b>Other</b>               | <i>Vacchelia nilotica</i>                   |                                  | ✓                                    | ✓                                        |                                          |                 |                                      |

146

147 Seed quantities and ubiquity point to barley (*Hordeum vulgare* L.), wheat (*Triticum*  
148 *turgidum/aestivum*), and grapes (*Vitis vinifera* L.) as the main cultivated crops, which were  
149 clearly calorific staples. Their local cultivation is attested to by cereal processing waste  
150 (rachis fragments, awn and glume fragments, culm nodes and rhizomes) and wine-pressing  
151 waste (grape pips, skins, and pedicels). In addition, lentil (*Lens culinaris* [L.] Coss. &  
152 Germ.), bitter vetch (*Vicia ervilia* [L.] Willd.), fig (*Ficus carica* L.), date (*Phoenix dactylifera*  
153 L.), and olive (*Olea europaea* L.) should also be counted as staples based on seed quantities  
154 and ubiquity (**Tables 1-2**). They were likely cultivated locally. Significantly, all identified  
155 staples were among the southwest Asian Neolithic founder crops and early fruit domesticates  
156 which formed a stable part of Levantine diets by the Early Bronze Age (3300–2000 BCE).

157 Grapes were previously shown to be the primary cash crop of the Byzantine Negev  
158 Highlands—particularly in the mid-5<sup>th</sup> to mid-6<sup>th</sup> c. CE—based on their changing relative  
159 frequencies [54]. Yet, we cannot rule out the possibility of cereal cultivation for export in  
160 some periods. One modern example is the export of Negev barley to Britain for beer  
161 production in the 19<sup>th</sup> century [60]. Interestingly, free-threshing hexaploid bread wheat  
162 (*Triticum aestivum* L.)—a more market-oriented wheat species identifiable archaeologically  
163 by indicative rachis segments—appears in the Negev Highlands only after the mid-6<sup>th</sup> c.  
164 (**Table 2**). This corresponds with the period of decline in viticulture [54].

165 In the ‘luxuries and supplements’ category we include potentially important and desirable  
166 dietary components which were minor and apparently nonessential in local consumption or  
167 agriculture. These include several food crops poorly represented in the local assemblages:  
168 fava bean (*Vicia faba* L.), fenugreek (*Trigonella foenum-graecum* L.), Spanish vetchling  
169 (*Lathyrus clymenum* L.), and white lupine (*Lupinus albus* L.) among the legumes; peach  
170 (*Prunus persica* [L.] Batsch), plum/cherry (*Prunus* subgen. *Cerasus/Prunus*), carob  
171 (*Ceratonia siliqua* L.) and jujuba (*Ziziphus jujuba* Mill.) among the tree-fruits; almond  
172 (*Prunus amygdalus* Batsch), walnut (*Juglans regia* L.), stone pine (*Pinus pinea* L.), pistachio  
173 nut (*Pistacia vera* L.) and hazel (*Corylus* sp.) among the nuts; the aubergine (*Solanum*  
174 *melongena* L.) as a unique summer vegetable (**Fig. 2-3**); and supplementary wild edibles such  
175 as beet (*Beta vulgaris* L.), coriander (*Coriandrum sativum* L.), and European bishop (*Bifora*  
176 *testiculata* [L.] Spreng.) (**Supplementary Table 4**). Any of these could have been cultivated  
177 in Negev Highland runoff farming [47, 59], or on site [61].

178 Another important ancient economic plant found in the assemblages is the Nile acacia, which  
179 does not grow today in the Negev. Previous archaeobotanical finds of Nile acacia in the  
180 Levant all come from Roman-period sites in the Dead Sea rift valley, which Kislev [62]  
181 interpreted as a component of the ancient flora in this region of Sudanian vegetation  
182 penetration. However, this was also an important region for desert-crossing camel caravan  
183 commerce. Nile acacia seed finds from Elusa (**Fig. 3**) are the first from outside the  
184 phytogeographic region of Sudanian vegetation, but they remain within the ancient caravan  
185 trade routes connecting the Red Sea and the Mediterranean. Therefore, we consider Nile  
186 acacia seeds to represent a Roman-period introduction to the Levant, whether as objects of  
187 cultivation or of trade at the Negev desert route sites. Other exotic trees used for quality wood  
188 and craft were identified by pollen and/or charcoal, including: cedar of Lebanon (*Cedrus*  
189 *libani* A.Rich.), European ash (*Fraxinus excelsior* L.), and boxwood (*Buxus sempervirens*  
190 L.). Cedar was identified by both charcoal and pollen, suggesting local garden cultivation  
191 (see Langgut et al. 2021 [59] and **Table 3**).



192 Table 2. Domesticated plant seeds order of magnitude by period, site, and area (from fine-sift)

| Century CE                       | 1 <sup>st</sup> -<br>3 <sup>rd</sup> | 4 <sup>th</sup> -<br>mid-5 <sup>th</sup> | mid-5 <sup>th</sup> -<br>mid-6 <sup>th</sup> |      | mid-5 <sup>th</sup> -<br>mid-7 <sup>th</sup> |      | mid-6 <sup>th</sup> -<br>mid-7 <sup>th</sup> |      | early 7 <sup>th</sup> |     | 7 <sup>th</sup> -<br>8 <sup>th</sup> | mid-7 <sup>th</sup> -8 <sup>th</sup> |        |     |     |
|----------------------------------|--------------------------------------|------------------------------------------|----------------------------------------------|------|----------------------------------------------|------|----------------------------------------------|------|-----------------------|-----|--------------------------------------|--------------------------------------|--------|-----|-----|
| Site                             | SVT                                  | HLZ                                      | HLZ                                          | SVT  | NZN                                          | NZN  | SVT                                          | SVT  |                       |     | NZN                                  | NZN                                  | SVT    |     |     |
| Area (midden)                    | P                                    | A4                                       | A1                                           | M    | A                                            | A    | O                                            | K2   | E                     | A   | E                                    | K1                                   | K2     | E   |     |
| Samples                          | 5                                    | 14                                       | 19                                           | 14   | 7                                            | 5    | 12                                           | 3    | 3                     | 27  | 10                                   | 13                                   | 13     | 12  |     |
| Vol. (L)                         | 15                                   | 85                                       | 85                                           | 42   | 21                                           | 15   | 36                                           | 9    | 9                     | 84  | 33                                   | 39                                   | 39     | 36  |     |
| <b>Plant species</b>             |                                      |                                          |                                              |      |                                              |      |                                              |      |                       |     |                                      |                                      |        |     |     |
| <i>Hordeum vulgare</i>           | XX                                   | XXX                                      | XXX                                          | XX   | XXX                                          | XX   | XX                                           | XXX  | XXX                   | XXX | XXX                                  | XXX                                  | XXX    | XXX | XXX |
| <i>Triticum</i> sp.              | XX                                   | XX                                       | XX                                           | XX   | X                                            | X    | X                                            | XX   | XX                    | XX  | XXX                                  | XXX                                  | XXX    | XXX | XXX |
| <i>Lens culinaris</i>            |                                      | XX                                       | XX                                           | X    | XX                                           |      | X                                            | X    | X                     | X   | XX                                   | XX                                   | X      | X   |     |
| <i>Vicia ervilia</i>             | X                                    | X                                        | X                                            | X    | X                                            | X    | X                                            | X    | XX                    | X   | XX                                   | XX                                   | X      | XX  |     |
| <i>Trigonella foenum-graecum</i> |                                      | X                                        |                                              |      |                                              |      |                                              |      | X                     | X   | X                                    | X                                    | X      |     |     |
| <i>Lathyrus clymenum</i>         |                                      |                                          |                                              |      |                                              |      |                                              |      |                       | X   |                                      | X                                    |        |     |     |
| <i>Lupinus albus</i>             |                                      |                                          |                                              |      |                                              |      |                                              |      |                       |     |                                      | X                                    |        |     |     |
| <i>Vitis vinifera</i>            | X                                    | XX                                       | XX                                           | XX   | XX                                           | X    | XX                                           | XX   | X                     | XXX | XXX                                  | XXX                                  | XXX    | XX  |     |
| <i>Ficus carica</i>              | X                                    | XXX                                      | XXX                                          | XX   | X                                            | X    | XX                                           | X    | X                     | XX  | X                                    | X                                    | XX     |     |     |
| <i>Olea europaea</i>             |                                      | X                                        |                                              | X    | X                                            | X    | X                                            | X    |                       | X   | XX                                   | X                                    | X      | X   |     |
| <i>Phoenix dactylifera</i>       | X                                    | X                                        | X                                            | X    | X                                            |      | X                                            | X    | X                     | X   | XX                                   | XX                                   | X      | X   |     |
| <i>Punica granatum</i>           |                                      | rind                                     |                                              | rind | X                                            | rind | X                                            | rind |                       | X   | XX                                   | X                                    | X      | X   |     |
| <i>Cerantonia siliqua</i>        |                                      |                                          |                                              |      |                                              |      |                                              |      |                       | X   |                                      | X                                    | pistil |     |     |
| <i>Prunus amygdalus</i>          |                                      |                                          |                                              |      |                                              |      |                                              |      |                       | X   |                                      | X                                    | X      | X   |     |
| <i>Prunus persica</i>            |                                      | X                                        |                                              |      |                                              |      | X                                            |      |                       | X   |                                      | X                                    |        |     |     |
| <i>Pinus pinea</i>               |                                      |                                          |                                              |      |                                              |      |                                              |      |                       | X   | X                                    |                                      |        |     |     |
| <i>Solanum melongena</i>         |                                      |                                          |                                              |      |                                              |      |                                              |      |                       | X   |                                      |                                      |        | X   |     |
| <i>Vachellia nilotica</i>        |                                      | X                                        | X                                            |      | X                                            |      |                                              |      |                       |     |                                      |                                      |        |     |     |

193

194 Sites abbreviated as: SVT-Shivta; HLZ-Elusa; NZN-Nessana; for midden locations see Figure 1. Orders of  
 195 magnitude presented as  $1 \leq X < 10 \leq XX < 100 \leq XXX < 1000$ . See **Supplementary Information** for sifting and  
 196 sampling strategy.

197 *Figure 3. Select plant remains from the Negev Highland middens*

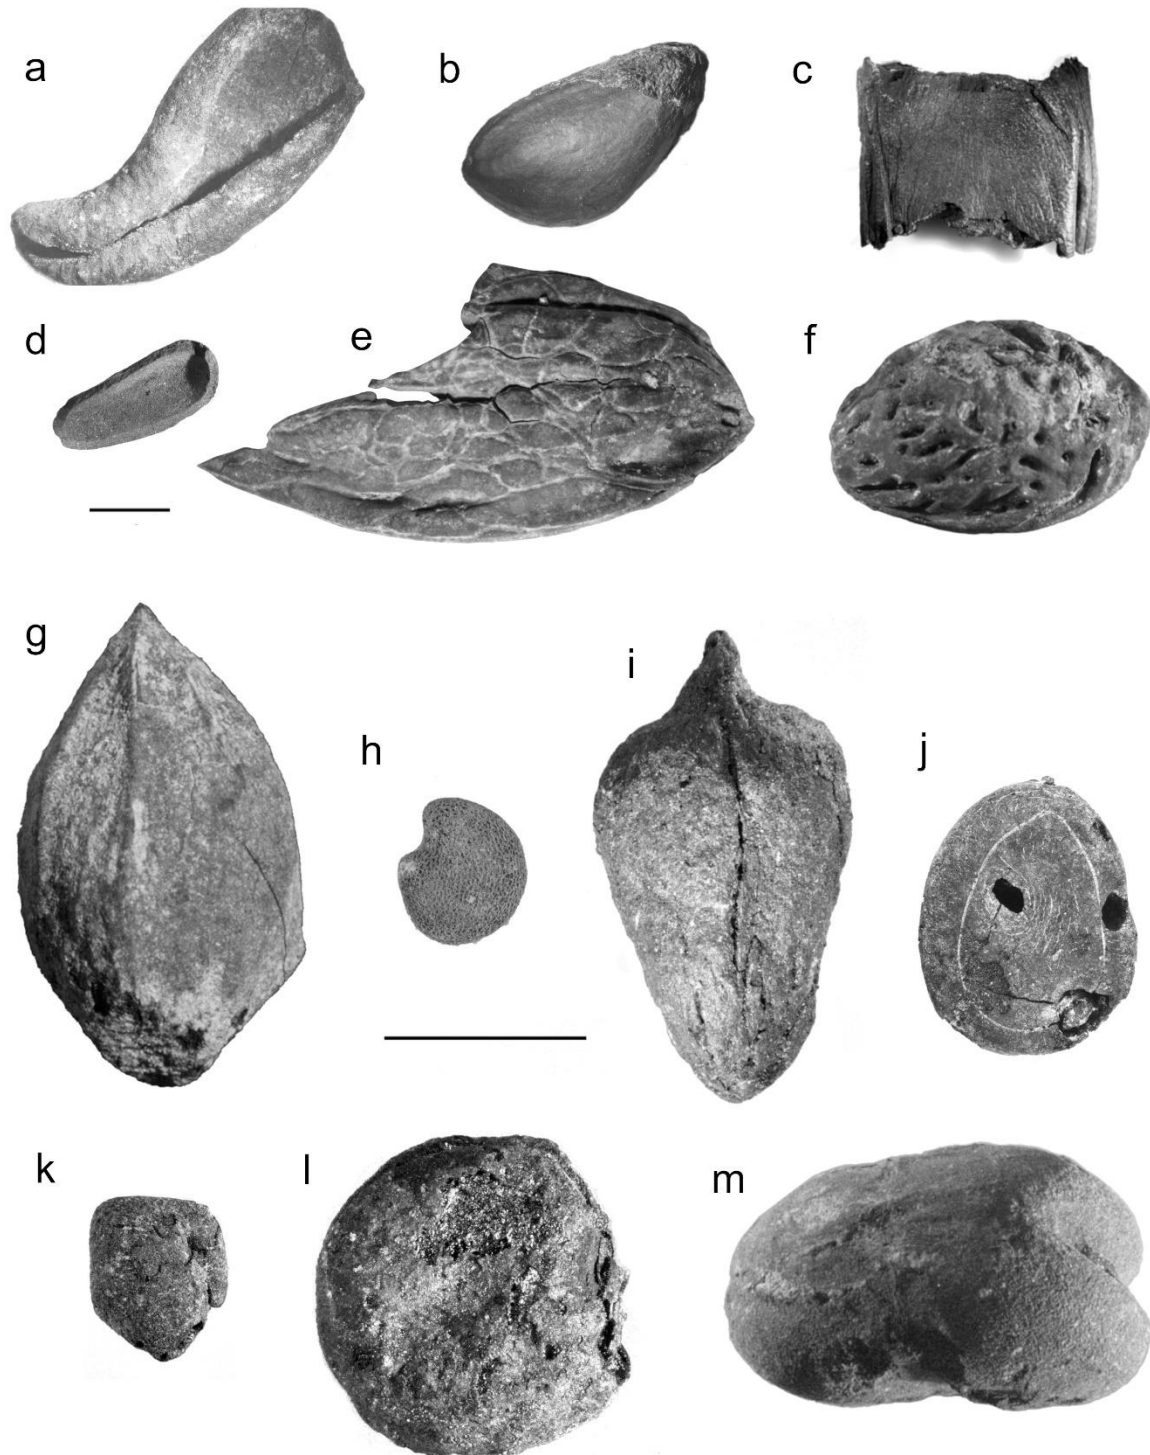

198  
199 (a) charred almond (*Prunus amygdalus* Batsch.) exocarp; (b) charred pistachio (*Pistacia vera* L.) drupe; (c)  
200 charred carob (*Ceratonia siliqua* L.) pod fragment; (d) uncharred stone pine (*Pinus pinea* L.) outer seed coat  
201 fragment; (e) uncharred walnut (*Juglans regia* L.) endocarp of the thin-shelled variety (f) charred peach (*Prunus*  
202 *persica* [L.] Batsch) endocarp; (g) charred cherry/plum (*Prunus* subgen. *Cerasus/Prunus*) endocarp; (h)  
203 uncharred aubergine (*Solanum melongena* L.) seed; (i) charred jujuba (*Ziziphus jujuba* Mill.) endocarp; (j)  
204 charred *Vachellia nilotica* (L.) P.J.H.Hurter & Mabb. seed; (k) charred fenugreek (*Trigonella foenum-*  
205 *graecum/berythea*) seed; (l) charred white lupine (*Lupinus albus* L.) seed; (m) charred fava bean (*Vicia faba*  
206 L.). Scale bars = 5mm; all photos in grayscale (photographed by: Daniel Fuks and Yoel Melamed).

207 Complementing the seed/fruit remains presented above, palynological and anthracological  
 208 analyses support local cultivation of grapevine, fig, olive, date, pomegranates, carob, and the  
 209 *Prunus* genus, which includes almond, peach, plum and/or cherry [59]. Based on stone pine  
 210 seed coats, and the identification of Pinaceae pollen (= pine other than the local Aleppo pine),  
 211 it is plausible that stone pine was cultivated locally, albeit on a small scale (**Table 3**). Pollen  
 212 evidence also supports local cultivation of hazel – another domesticated unattested in the  
 213 southern Levant before the Roman period (**Tables 3, 5; Supplementary Tables 5-6**).

214

215 *Table 3. Combined evidence for fruit/nut trees*

| Taxon                      | Common name       | Seeds/Fruit |     |     | Charcoal |     |     | Pollen |       |       |
|----------------------------|-------------------|-------------|-----|-----|----------|-----|-----|--------|-------|-------|
|                            |                   | SVT         | NZN | HLZ | SVT      | NZN | HLZ | SVT 1  | SVT 2 | SVT 3 |
| <i>Vitis vinifera</i>      | grapevine         | +           | +   | +   | +        | +   | -   | +      | +     | +     |
| <i>Olea europaea</i>       | olive             | +           | +   | +   | +        | -   | +   | +      | +     | +     |
| <i>Ficus carica</i>        | common fig        | +           | +   | +   | +        | +   | +   | -      | -     | -     |
| <i>Phoenix dactylifera</i> | date palm         | +           | +   | +   | +        | -   | -   | +      | +     | +     |
| <i>Ceratonia siliqua</i>   | carob             | +           | +   | +   | -        | -   | -   | +      | -     | +     |
| <i>Punica granatum</i>     | pomegranate       | +           | +   | +   | -        | +   | -   | -      | -     | -     |
| <i>Prunus</i> spp.         | almond/peach/plum | +           | +   | +   | +        | +   | -   | -      | -     | -     |
| <i>Pinus</i> spp.          | pine              | +           | +   | -   | +        | +   | +   | +      | +     | +     |
| <i>Corylus</i> sp.         | hazel             | -           | -   | -   | -        | -   | -   | +      | -     | +     |
| <i>Ficus sycomorus</i>     | sycomore fig      | -           | -   | -   | -        | +   | +   | -      | -     | -     |
| <i>Hyphaene thebaica</i>   | doum palm         | -           | -   | -   | +        | +   | -   | -      | -     | -     |
| <i>Juglans regia</i>       | walnut            | +           | -   | -   | -        | -   | -   | -      | -     | -     |
| <i>Pistacia vera</i>       | pistachio         | +           | -   | -   | *        | *   | -   | -      | -     | -     |
| <i>Ziziphus jujuba</i>     | jujuba            | +           | -   | -   | *        | *   | -   | -      | -     | -     |

216

217 *Carpological, anthracological and palynological evidence for fruit- and exotic trees in the*  
 218 *study sites. Assessment of local cultivation is based on the combination of proxies and*  
 219 *especially pollen to include grapevine, fig, olive, date, pomegranate, carob, hazelnut, cedar*  
 220 *and the Prunus genus (potentially including almond, peach, plum and/or cherry). Local*  
 221 *cultivation of stone pine may also plausibly be inferred. SVT1= South reservoir, Shivta; SVT*  
 222 *2 = North reservoir, Shivta; SVT3 = North church garden, Shivta; + indicates presence; -*  
 223 *indicates absence; \*indicates charcoal identified to genus, including possible local wild*  
 224 *species. Prunus spp. includes Prunus dulcis and Prunus domestica/cerasus endocarp/exocarp,*  
 225 *and Prunus spp. charcoal. Pinus spp. includes Pinus pinea seed coats, Pinus halepensis*  
 226 *charcoal, and Pinus sp. pollen.*  
 227

228 Overall, the later-period middens were more concentrated in plant remains, and it is in the  
 229 Early Islamic period middens where we find most of the rare domesticated species, RAD  
 230 crops included (**Table 1**). This appears to be related to taphonomy, and therefore absence of  
 231 RAD crops in the Byzantine middens should not be taken as evidence of their absence (see  
 232 **Supplementary Information**). Samples containing the unique finds of white lupine and  
 233 jujuba – which are unprecedented in southern Levantine archaeobotany – were dated to the  
 234 Umayyad or early Abbasid period (mid-7<sup>th</sup> – late 8<sup>th</sup> c. cal. CE at 2 $\sigma$ ; see **Fig. 1; Table 4** and  
 235 **Supplementary Information**). However, textual studies have identified these species in  
 236 Roman-period texts of the southern Levant [22]. The sample from Shivta containing  
 237 aubergine seeds was dated to the Abbasid period (772-974 cal CE at 2 $\sigma$ ), supporting previous  
 238 finds from Abbasid Jerusalem [25,40-41].

239 *Table 4. Radiocarbon dating of select loci*

| Radiocarbon Lab. no. | Site    | Locus | Basket | Special find | Material dated      | Uncal BP      | Cal. CE (1 $\sigma$ ) | Cal. CE (2 $\sigma$ ) |
|----------------------|---------|-------|--------|--------------|---------------------|---------------|-----------------------|-----------------------|
| Poz-141223           | Nessana | 101   | 1040-1 | white lupine | charred barley seed | 1335 $\pm$ 30 | 654 (46.4%) 682       | 647 (61.0%) 708       |
|                      |         |       |        |              |                     |               | 745 (18.3%) 760       | 730 (34.5%) 775       |
|                      |         |       |        |              |                     |               | 768 ( 3.6%) 771       |                       |
| Poz-141225           | Shivta  | 504   | 5029   | aubergine    | charred barley seed | 1170 $\pm$ 30 | 776 ( 9.7%) 788       | 772 (73.9%) 901       |
|                      |         |       |        |              |                     |               | 825 (49.0%) 894       | 916 (21.6%) 974       |
|                      |         |       |        |              |                     |               | 928 ( 9.6%) 945       |                       |
| Poz-141226           | Shivta  | 501   | 5108   | jujuba       | charred barley seed | 1295 $\pm$ 30 | 670 (33.4%) 704       | 659 (95.4%) 775       |
|                      |         |       |        |              |                     |               | 739 (34.9%) 772       |                       |

240

241 Considering together the domestic plants evident in the Negev Highlands according to their  
 242 period of first attestation in the southern Levant – archaeobotanically and historically – offers  
 243 a window onto processes of long-term crop diffusion (**Table 5**). While their quantities and  
 244 ubiquities indicate that RAD and IGR crops were initially of minor significance, they make  
 245 up over a third of the domesticates' species diversity (**Fig. 4; Table 5**). All the more  
 246 surprising considering the Negev Highlands' desert and present-day peripheral status, this  
 247 new data reveals for the first time the extent of western influence on local agriculture and  
 248 trade (**Fig. 5**).

249 *Table 5. Earliest archaeobotanical evidence in the southern Levant for domestication/introduction*  
 250 *of Negev Highland domesticated plants*

| Latin name                                     | Period                 | Tag                     | Approx date                               | Reference                                                  |
|------------------------------------------------|------------------------|-------------------------|-------------------------------------------|------------------------------------------------------------|
| <i>Hordeum vulgare</i>                         | PPNB                   | Founder crop            | 9 <sup>th</sup> mill. BCE                 | Zohary et al. 2012 [3]                                     |
| <i>Lens culinaris</i>                          | PPNB                   | Founder crop            | 9 <sup>th</sup> mill. BCE                 | Caracuta et al. 2017 [74]                                  |
| <i>Vicia ervilia</i>                           | PPNB                   | Founder crop            | 9 <sup>th</sup> mill. BCE                 | Caracuta et al. 2017 [74]                                  |
| <i>Vicia faba</i>                              | PPNB                   | Founder crop            | 9 <sup>th</sup> mill. BCE                 | Caracuta et al. 2017 [74]                                  |
| <i>Triticum turgidum</i> s.l. (free-threshing) | PPNB                   | Founder crop            | 7 <sup>th</sup> mill. BCE                 | Feldman and Kislev 2007 [75]                               |
| <i>T. aestivum</i> (free-threshing)            | NA                     | Founder crop            | NA                                        | Zohary et al. 2012 [3]                                     |
| <i>Olea europaea</i>                           | Chalcolithic/E. Bronze | Early fruit domesticate | 5 <sup>th</sup> mill. BCE                 | Langgut et al. 2019 [76]                                   |
| <i>Ficus carica</i>                            | Chalcolithic/E. Bronze | Early fruit domesticate | 5 <sup>th</sup> mill. BCE                 | Weiss 2015 [77]                                            |
| <i>Vitis vinifera</i>                          | Chalcolithic/E. Bronze | Early fruit domesticate | 5 <sup>th</sup> mill. BCE                 | Weiss 2015 [77]                                            |
| <i>Phoenix dactylifera</i>                     | Chalcolithic/E. Bronze | Early fruit domesticate | 5 <sup>th</sup> mill. BCE                 | Weiss 2015 [77]                                            |
| <i>Punica granatum</i>                         | Chalcolithic/E. Bronze | Early fruit domesticate | 5 <sup>th</sup> mill. BCE                 | Melamed 2002 [78]                                          |
| <i>Prunus amygdalus</i>                        | Chalcolithic/E. Bronze | Early fruit domesticate | 5 <sup>th</sup> mill. BCE                 | Zohary et al. 2012 [3]                                     |
| <i>Lathyrus clymenum</i>                       | Middle Bronze          | Bronze Age introduction | 19 <sup>th</sup> -18 <sup>th</sup> c. BCE | Kislev et al. 1993 [79]                                    |
| <i>Juglans regia</i>                           | Middle Bronze          | Bronze Age introduction | 18 <sup>th</sup> c. BCE                   | Langgut 2015 [80]                                          |
| <i>Trigonella foenum-graecum</i>               | Late Bronze Age IIA    | Bronze Age introduction | 14 <sup>th</sup> c. BCE                   | Weiss et al. 2019 [81]                                     |
| <i>Prunus persica</i>                          | Nabatean               | RAD crop                | 1 <sup>st</sup> c. BCE                    | Kislev and Simchoni 2009 [82]                              |
| <i>Vachellia nilotica</i>                      | Nabatean               | RAD crop                | 1 <sup>st</sup> c. BCE                    | Kislev 1990 [62]                                           |
| <i>Ceratonia siliqua</i>                       | Hellenistic-Roman      | RAD crop                | 1 <sup>st</sup> c. BCE                    | Zohary et al. 2012 [3]                                     |
| <i>Pinus pinea</i>                             | Hellenistic-Roman      | RAD crop                | 1 <sup>st</sup> c. BCE                    | Kislev 1988 [83]                                           |
| <i>Prunus</i> subgen. <i>Cerasus/Prunus</i>    | Roman                  | RAD crop                | 1 <sup>st</sup> c. CE                     | Tabak 2006 [84]                                            |
| <i>Pistacia vera</i>                           | Roman                  | RAD crop                | 2 <sup>nd</sup> c. CE                     | Hartman and Kislev 1998 [85]                               |
| <i>Corylus</i> sp.                             | Roman                  | RAD crop                | 2 <sup>nd</sup> c. CE                     | Kislev and Simchoni 2006 [23];<br>Langgut et al. 2021 [59] |
| <i>Lupinus albus</i>                           | Early Islamic          | RAD crop                | 7 <sup>th</sup> c. CE                     | this paper                                                 |
| <i>Ziziphus jujuba</i>                         | Early Islamic          | RAD crop                | 7 <sup>th</sup> c. CE                     | this paper                                                 |
| <i>Solanum melongena</i>                       | Early Islamic          | IGR crop                | 7 <sup>th</sup> c. CE                     | Amichay et al. 2019 [25]; this<br>paper                    |

251 *Note: The earliest evidence for Prunus subgen. Cerasus/Prunus refers to plum (Prunus subgen. Prunus) only. Cherry (Prunus*  
 252 *subgen. Cerasus) has yet to be identified in the southern Levantine archaeobotanical record.*

253 *Figure 4. Negev Highlands crop basket by period of introduction to the southern Levant*  
254 *(based on carpological remains)*

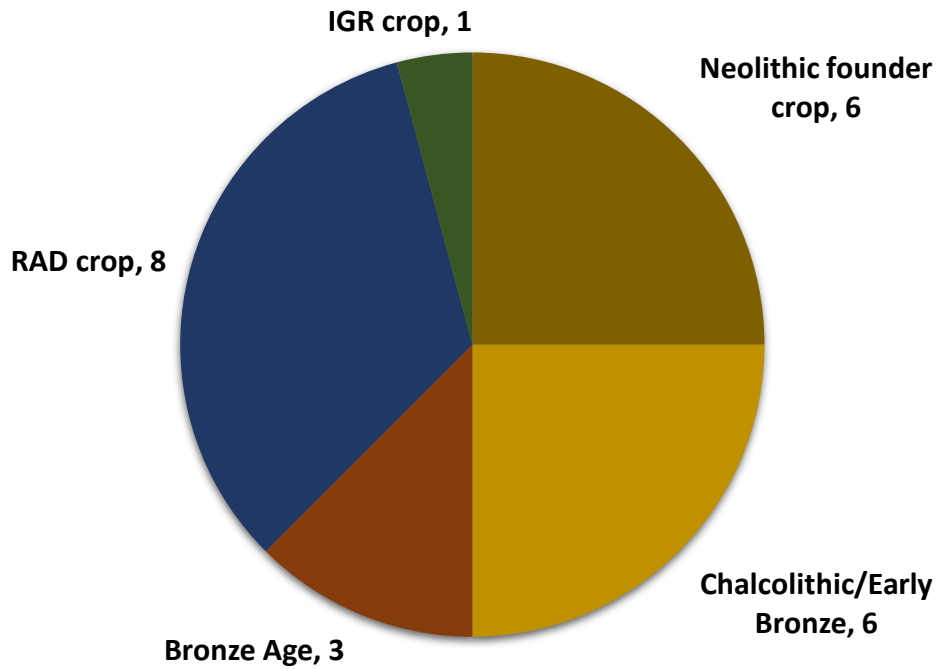

255

256 *Figure 5. First mill. CE southern Levantine introductions found in Negev Highland middens*

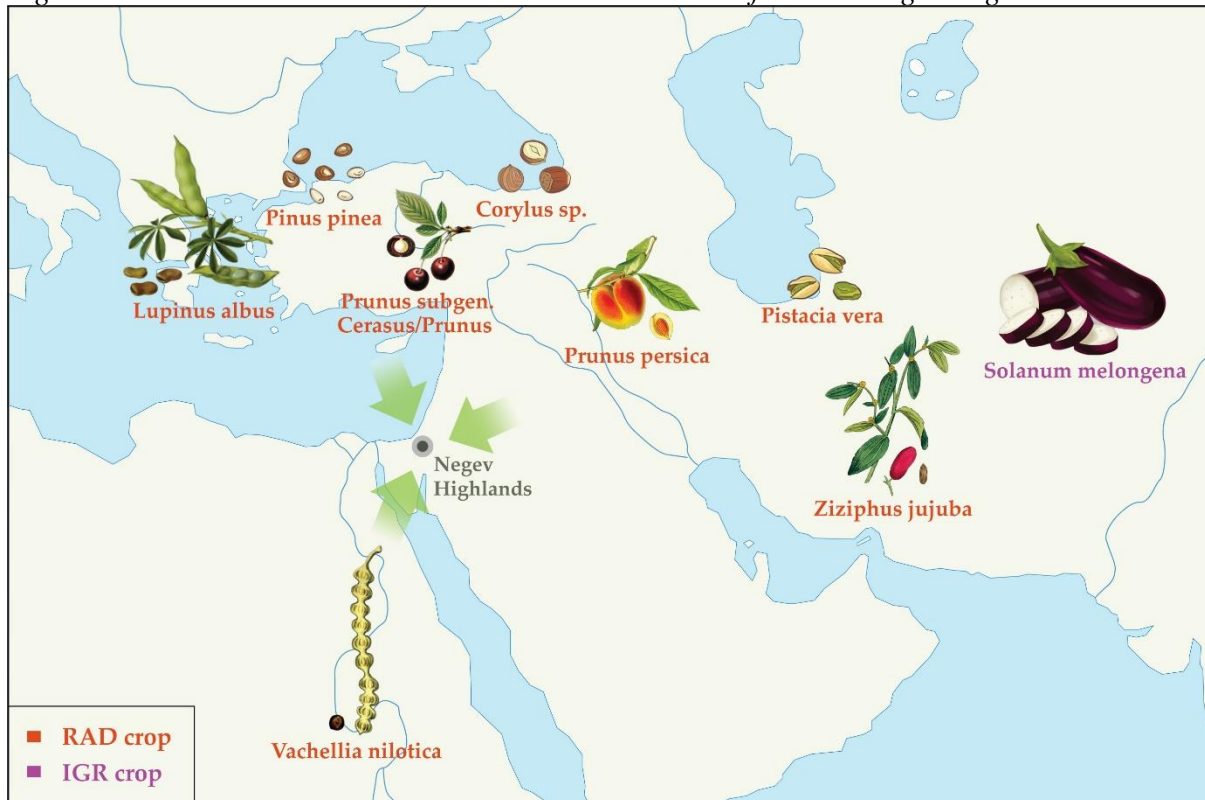

257

258 *Schematic representation of directions of first millennium CE crop diffusion into the southern Levant based on*  
259 *plants attested to in the Negev Highland middens. RAD crops are labeled red; IGR crops purple.*

260

261 *Discussion*

262 The critical mass afforded by the new, systematically retrieved and identified plant remains  
263 from Late Antique Negev Highland trash mounds allows not only reconstructions of local  
264 plant economy, but also insights on the dispersal of crop plants over the last 11.5 ky. Of the  
265 Negev Highland plant remains, only the aubergine is an IGR crop (**Table 5; Fig. 4-5**).  
266 Together with finds from Abbasid Jerusalem, seeds found in the Negev Highland middens are  
267 among the earliest archaeobotanical finds of this plant in the Levant and are roughly  
268 contemporary with the earliest textual references to aubergine [16,22]. Significantly,  
269 aubergine is the only summer crop in the Negev Highlands plant assemblage. In other regions  
270 of the southern Levant, summer crops were certainly cultivated in the Roman period [20,63],  
271 but the Early Islamic introduction of aubergine is consistent with Watson's claim that  
272 summer cultivation expanded in this later period [16,64]. Ultimately, widespread adoption of  
273 summer-winter crop rotation in the Mediterranean region effected changes in people's diets  
274 and work routines. Yet these changes clearly did not occur overnight. To be fair, the Early  
275 Islamic assemblages from the Negev Highlands do not offer enough of a time perspective to  
276 fully gauge the effects of Early Islamic crop introduction on their own as they span only the  
277 first 200-300 years of Islam. Yet it is also possible that finds from the 7<sup>th</sup>-8<sup>th</sup> century middens  
278 represent Byzantine agronomic traditions and techniques. Regardless, had crop introductions  
279 been inundating and pervasive during the Early Islamic period, we expect they would have  
280 been more apparent in Negev Highland crop diversity.

281 By contrast, the Negev Highlands crop basket highlights the influence of RAD, particularly  
282 on arboriculture. Of the 24 domestic plants identified by carpological remains, seven were  
283 introduced to the southern Levant during the 1<sup>st</sup> c. BCE to the 4<sup>th</sup> c. CE: pistachio nut, stone  
284 pine, peach, plum/cherry, jujuba, Nile acacia, white lupine, plus carob which is a local wild  
285 species but was apparently not fully domesticated until the Classical period (**Table 5**). Jujuba  
286 and white lupine are unprecedented in southern Levantine archaeobotany, but they are known  
287 from Roman-period texts and the archaeobotany of neighboring regions [65-68]. Considering  
288 pollen remains, hazelnut is an additional RAD species identified in the Negev Highlands, that  
289 was also found in Herod's garden at Caesarea, probably as an imported ornamental [69]. The  
290 fact that the RAD plant remains are more prevalent in the Early Islamic phase (**Table 1-2**) is  
291 likely the result of overall better preservation and plant richness in this phase. Therefore, we  
292 understand them to be part of the general Late Antique Negev Highlands domestic plant  
293 assemblage, noting that their earliest secure archaeobotanical records in the southern Levant

294 as a whole derive mostly from the 1<sup>st</sup> c. BCE to the 2<sup>nd</sup> c. CE (**Table 5**). We acknowledge that  
295 some RAD species are first attested to at the end of the Hellenistic period of the southern  
296 Levant in the 1<sup>st</sup> c. BCE. We nonetheless consider them RAD crops in view of chronological  
297 proximity and their entrenchment in local agriculture and culture during the Roman period.  
298 Allowing for gaps in the archaeobotanical record, partially compensated by textual  
299 references, it is still fair to say that the RAD plants—which comprise a significant proportion  
300 of species diversity in the Late Antique Negev Highland basket of domestic plants—were  
301 introduced to the southern Levant over a relatively short period in Holocene history.

302 The snapshot presented here of the Negev Highlands' microregional crop basket supports and  
303 significantly enhances previous evidence for 1<sup>st</sup> millennium CE crop diffusion. Together with  
304 the archaeobotany of sites from southern Jordan [70] and Jerusalem [25,41], the Negev  
305 Highland plant remains attest to Roman and Byzantine agricultural influence on the spread of  
306 fruit crops such as peach, pear, plum, jujuba, apricot, cherry, pistachio nut, pine nut, and  
307 hazelnut, among others, and to Abbasid introduction of aubergines in the southern Levant.

308 Altogether, this evidence suggests that RAD was a greater force in the agricultural history of  
309 the first millennium CE than the IGR, which is also the current consensus from Iberia [39].

310 The significance of RAD is evident in the archaeobotany of additional regions, such as Italy,  
311 northwest Europe and Britain [34,38,68]. However, we should not dismiss the IGR on these  
312 grounds alone, since several of the proposed IGR crops are less likely to leave identifiable  
313 macroscopic traces (e.g., sugar cane, colocasia), and there is textual evidence for Early  
314 Islamic crop diffusion and agricultural development [22]. Hence it may be appropriate and  
315 productive to consider RAD and IGR part of the same process of first millennium CE  
316 agricultural development, as indicated by Early Islamic expansion of Roman and Byzantine  
317 crop introductions. Clearly the first millennium CE was an unprecedented period of change in  
318 local crop-plant species diversity in the eastern Mediterranean and beyond. The multi-  
319 regional evidence suggests that the multi-empire combination of Roman-Byzantine and  
320 Umayyad-Abassid regimes was a major force for crop diffusion, with a likely role for  
321 developments in the Sassanid empire underrepresented in current research. Yet the evidence  
322 presented here demonstrates that even the combined forces underlying first millennium CE  
323 crop diffusion affected, but did not immediately transform, people's diets. At least until the  
324 end of that millennium, inhabitants of the Levant and Mediterranean region continued to rely  
325 primarily on long tried and tested Neolithic founder crops and early fruit domesticates.  
326 Indeed, this situation widely persisted until the latter second millennium CE.



327 The new microregional data presented above supports an emerging multi-regional picture of  
328 both an unprecedented period for plant migrations and food diversity in the first millennium  
329 CE as well as gradual and incomplete local adoption. This is evident from Late Antique  
330 Negev Highlands archaeobotanical assemblages within which plants first attested to in the  
331 southern Levant during this period account for one third of the domesticated plant species  
332 diversity – more than any other period represented in the assemblage. Among these crops,  
333 only the aubergine represents an Early Islamic introduction, suggesting that Roman  
334 Agricultural Diffusion (RAD) was a greater force for intercontinental movement of crop  
335 plants than the proposed Islamic Green Revolution (IGR). However, both RAD and IGR  
336 plant species are very rare in the Negev Highlands assemblages, indicating slow  
337 incorporation into local foodways and agriculture. These findings present a window to a  
338 wider perspective on the last 11.5 millennia of southwest Asian crop diffusion, in which the  
339 first millennium CE is unprecedented for the diversity of plant species in motion yet  
340 consistent with a long-term pattern of gradual local adoption.

#### 341 *Materials and Methods*

342 Eleven middens from the three sites, Elusa, Shivta and Nessana, were excavated at  
343 approximately 10 cm spits to ensure chronological control. An intensive sampling-and-sifting  
344 strategy was followed to ensure optimal retrieval of plant remains (see **Supplementary**  
345 **Information**). Fine-sifted samples (see **Supplementary Information**) were sorted using an  
346 Olympus SZX9 stereo microscope and analyzed in the Bar-Ilan University Archaeobotany  
347 Lab. Course sifted samples were sorted by volunteers and archaeology students during the  
348 excavation and thereafter. Seed finds from the course sifting were examined and rare  
349 specimens taken to the Bar-Ilan University Archaeobotany Lab for identification. All  
350 identifications were made with reference to the Israel National Collection of Plant Seeds and  
351 Fruits at Bar-Ilan University. To confirm identification, the jujuba (*Ziziphus jujuba* Mill.)  
352 endocarp was scanned using a Bruker SkyScan 1174 desktop micro-CT scanner  
353 (**Supplementary Videos 1-2**). Identification criteria for this and other select specimens  
354 appear in the **Supplementary Information**. Information on previous archaeobotanical  
355 records of cultivated species was retrieved from the cited literature and lab records, as well as  
356 from online databases of archaeobotanical finds [71-73]. For palynological analysis, sediment  
357 samples from the middens were collected. However, all samples showed pollen barrenness,  
358 probably because of oxidation. Pollen from the reservoir and the northern church at Shivta

359 did contribute additional taxa, as did wood and charcoal analyses. Results of pollen and wood  
360 analyses published by Langgut et al. [43,59] are summarized in **Supplementary Tables 5-6**.

361 The excavations' stratigraphic, ceramic, and radiocarbon analyses enabled differentiation of  
362 five chronological phases obtained from the middens [43,54]: Roman (ca. 0–300 CE), Early  
363 Byzantine (ca. 300–450 CE), Middle Byzantine (ca. 450–550 CE), Late Byzantine (ca. 550–  
364 650 CE) and Umayyad (ca. 650–750 CE), which was adjusted slightly based on radiocarbon  
365 dates presented herein. This enabled detection of trends within the Byzantine period as well  
366 as broader chronological comparisons. These periods are each represented by between one  
367 and four middens, and some middens span two periods (see **Table 2**). Grouping the seed/fruit  
368 crop remains into broad periods of introduction to the southern Levant was used to provide a  
369 general sketch of crop diffusion's local influence in time.

#### 370 *Data Availability*

371 Only securely identified plant taxa are reported in the results of this study. All relevant data  
372 are included in the manuscript and supplementary materials. The investigated plant remains  
373 are currently stored in the Israel National Collection of Plant Seeds and Fruits at Bar-Ilan  
374 University and may be accessed by request to the authors.

#### 375 *Acknowledgements*

376 As part of a Ph.D. dissertation conducted at Bar-Ilan University, this research was supported  
377 by the Bar-Ilan Doctoral Fellowships of Excellence Program, the Rottenstreich Fellowship of  
378 the Israel Council for Higher Education, and the Molcho fund for agricultural research in the  
379 Negev. As part of the NEGEVBYZ project, this research was also supported by the European  
380 Research Council under the European Union's Horizon 2020 Research and Innovation  
381 Programme (grant 648427) and the Israel Science Foundation (grant 340-14). Manuscript  
382 preparation was further supported by a Newton International Fellowship of the British  
383 Academy and a Marie S. Curie International Fellowship of the European Commission's  
384 Horizon 2020 Framework Programme. Archaeology was conducted on behalf of the Zinman  
385 Institute of Archaeology, University of Haifa, under licenses of the Israel Antiquities  
386 Authority (Elusa: G-69/2014, G-10/2015, G-6/2017; Shivta: G-87/2015, G-4/2016; Nessana:  
387 G-4/2017). We also wish to thank the Israel Nature and Parks Authority for facilitating the  
388 excavations at Elusa, Shivta, and Nessana, as well as Ami and Dina Oach of Shivta Farm. For  
389 assistance with processing during the excavations, we are grateful to Ifat Shapira, Uri  
390 Yehuda, Ruti Roche, Gabriel Fuks, University of Haifa graduate students Aehab Asad, Ari

391 Levy, and Yaniv Sfez, and countless other volunteers. We also wish to thank Y. Mahler-  
392 Slasky, Tammy Friedman, A. Hartmann-Shenkman, Michal David, Suembikya Frumin, I.  
393 Berko, and O. Bashari for laboratory assistance; Senthil Ram Prabhu Thangadurai and Prof.  
394 Ron Shahar of the Hebrew University of Jerusalem's Laboratory of Bone Biomechanics for  
395 micro-CT scanning; and Sapir Haad for graphics.

#### 396 *Competing interests*

397 The authors declare that there are no competing interests associated with this submission.

#### 398 *References*

- 399 1. Vavilov, N.I. (2009) *Origin and geography of cultivated plants*. Translated by Doris  
400 Löve. Cambridge: Cambridge University Press.
- 401 2. Diamond, J. (2002) Evolution, consequences and future of plant and animal  
402 domestication. *Nature* 418: 700–707.
- 403 3. Zohary, D., Hopf, M. and Weiss, E. (2012) *Domestication of plants in the Old World*, 4th  
404 edition. Oxford: Oxford University Press.
- 405 4. Jones, M., Hunt, H., Lightfoot, E., Lister, D., Liu, X. and Motuzaite-Matuzeviciute, G.  
406 (2011). Food globalization in prehistory. *World Archaeology* 43(4): 665–675.
- 407 5. Boivin N., Fuller D.Q., Crowther A. (2012) Old World globalization and the Columbian  
408 exchange: comparison and contrast. *World Archaeology* 44(3): 452–469.
- 409 6. Liu, X., Jones, P. J., Matuzeviciute, G. M., Hunt, H. V., Lister, D.L., An, T, Przelomska,  
410 N, Kneale C.J., Zhao Z. and Jones, M.K. (2019) From ecological opportunism to multi-  
411 cropping: Mapping food globalisation in prehistory. *Quaternary Science Reviews* 206:  
412 21-28.
- 413 7. Sherratt, A. (2006). The Trans-Eurasian Exchange: the prehistory of Chinese relations  
414 with the West. In V. Mair (ed.), *Contact and exchange in the ancient world*, pp. 30-61.  
415 Honolulu: Hawaii University Press.
- 416 8. Zhou, X., Yu, J., Spengler, R.N. et al. (2020). 5,200-year-old cereal grains from the  
417 eastern Altai Mountains redate the trans-Eurasian crop exchange. *Nature Plants* 6: 78–87  
418 (2020). <https://doi.org/10.1038/s41477-019-0581-y>
- 419 9. Zohary, D. and Hopf, M. (1973) Domestication of pulses in the Old World. *Science*,  
420 182(4115): 887-894.
- 421 10. Smith, B.D. (1989) Origins of agriculture in eastern North America. *Science*, 246(4937):  
422 1566-1571.
- 423 11. Denham, T.P., Haberle, S.G., Lentfer, C., Fullagar, R., Field, J., Therin, M., Porch, N. and  
424 Winsborough, B. (2003) Origins of agriculture at Kuk Swamp in the highlands of New  
425 Guinea. *Science*, 301(5630): 189-193.
- 426 12. Tanno, K.I. and Willcox, G. (2006). How fast was wild wheat domesticated? *Science*,  
427 311(5769): 1886-1886.
- 428 13. Weiss, E., Kislev, M.E. and Hartmann, A. (2006) Autonomous cultivation before  
429 domestication. *Science*, 312(5780): 1608-1610.
- 430 14. Purugganan, M. D., & Fuller, D. Q. (2009). The nature of selection during plant  
431 domestication. *Nature*, 457(7231), 843-848.
- 432 15. Riehl, S., Zeidi, M. and Conard, N.J. (2013) Emergence of agriculture in the foothills of  
433 the Zagros Mountains of Iran. *Science*, 341(6141): 65-67.
- 434 16. Watson, A.M. (1983) *Agricultural innovation in the early Islamic world: the diffusion of*  
435 *crops and farming techniques, 700–1100*. Cambridge: Cambridge University Press.

- 436 17. Decker, M. (2009) Plants and progress: rethinking the Islamic agricultural  
437 revolution. *Journal of World History* 20(2): 187–206.
- 438 18. Johns, J. (1984). A Green Revolution? “Agricultural innovation in the early Islamic  
439 world: the diffusion of crops and farming techniques, 700–1100.” By Andrew M. Watson.  
440 Cambridge University Press, 1983. Pp. xii+ 260. £ 25. *Journal of African History*, 25(3):  
441 343–344.
- 442 19. Ashtor, E. (1985) Review of: A.M. Watson, ‘Agricultural innovation in the Early Islamic  
443 world’. *Bibliotheca Orientalis* 42: 421–431.
- 444 20. Decker, M. (2009) *Tilling the hateful earth*. Oxford: Oxford University Press
- 445 21. Kamash, Z. (2012) Irrigation technology, society and environment in the Roman Near  
446 East. *Journal of Arid Environments* 86: 65–74.
- 447 22. Amar Z. (2000) *Agricultural produce in the Land of Israel in the Middle Ages*. Jerusalem:  
448 Yad Yitzhak Ben-Zvi (Hebrew).
- 449 23. Kislev, M.E. and Simchoni, O. (2006) Botanical evidence for the arrival of refugees from  
450 Judea to refuge cave in Nahal Arugot in the fall of 135 CE. *Judea & Samaria Research*  
451 *Studies* 15: 141–150. (Hebrew with English summary).
- 452 24. Aubaile, F. (2012) Pathways of diffusion of some plants and animals between Asia and  
453 the Mediterranean region. *Revue d’ethnoécologie* 1.  
454 <https://doi.org/10.4000/ethnoecologie.714>
- 455 25. Amichay, O., Ben-Ami, D., Tchekhanovets, Y., Shahack-Gross, R., Fuks, D. and Weiss,  
456 E. (2019) A bazaar assemblage: reconstructing consumption, production and trade from  
457 mineralised seeds in Abbasid Jerusalem. *Antiquity* 93 (367): 199–217.
- 458 26. Mudge, K., Janick, J., Scofield, S. and Goldschmidt, E.E. (2009) A history of grafting.  
459 *Horticultural Reviews*, 35: 437–493.
- 460 27. Mercuri, A.M., Accorsi, C.A. and Mazzanti, M.B. (2002) The long history of *Cannabis*  
461 and its cultivation by the Romans in central Italy, shown by pollen records from Lago  
462 Albano and Lago di Nemi. *Vegetation History and Archaeobotany* 11(4): 263–276.
- 463 28. Pelling, R. (2005) Garamantian agriculture and its significance in a wider North African  
464 context: The evidence of the plant remains from the Fazzan project. *Journal of North*  
465 *African Studies* 10(3–4): 397–412.
- 466 29. Cappers R.T.J. (2006) *Roman food prints at Berenike: Archaeobotanical evidence of*  
467 *subsistence and trade in the Eastern Desert of Egypt*. Los Angeles: Cotsen Institute of  
468 Archaeology.
- 469 30. Van der Veen, M. (2011) *Consumption, trade and innovation: exploring the botanical*  
470 *remains from the Roman and Islamic ports at Quseir al-Qadim, Egypt*. Frankfurt: Africa  
471 Magna Verlag.
- 472 31. Wilson, A. (2002) Machines, power and the ancient economy. *Journal of Roman*  
473 *Studies* 92: 1–32.
- 474 32. Kron, G. (2012) Food Production. In: W. Scheidel (ed.), *The Cambridge companion to*  
475 *the economic history of the Roman World* (pp. 156–174). Cambridge: Cambridge  
476 University Press.
- 477 33. Avital, A. (2014) Representation of crops and agricultural tools in Late Roman and  
478 Byzantine mosaics of the Land of Israel. PhD thesis, Bar-Ilan University (Hebrew).
- 479 34. Van der Veen, M., Livarda, A. and Hill, A. (2008) New plant foods in Roman Britain –  
480 dispersal and social access. *Environmental Archaeology* 13(1): 11–36.
- 481 35. Butzer, K.W., Mateu, J.F., Butzer, E.K. and Kraus, P. (1985) Irrigation agrosystems in  
482 eastern Spain: Roman or Islamic origins? *Annals of the Association of American*  
483 *Geographers* 75(4): 479–509.
- 484 36. Van der Veen, M., Bouchaud, C., Cappers, R. and Newton, C. (2018) Roman Life in the  
485 Eastern Desert of Egypt: food, imperial power and geopolitics. In: Jean-Pierre Brun

- 486 (ed.), *The Eastern Desert of Egypt during the Greco-Roman Period: archaeological*  
487 *reports*. Paris: Collège de France.
- 488 37. Livarda, A. (2011) Spicing up life in northwestern Europe: exotic food plant imports in  
489 the Roman and medieval world. *Vegetation History and Archaeobotany* 20(2): 143–164.
- 490 38. Langgut D. (2017) The Citrus route revealed: from Southeast Asia into the  
491 Mediterranean. *HortScience* 52: 814–822.
- 492 39. Peña-Chocarro, L., Pérez-Jordà, G., Alonso, N., Antolín, F., Teira-Brión, A., Tereso, J.P.,  
493 Moya, E.M.M. and Reyes, D.L. (2019) Roman and medieval crops in the Iberian  
494 Peninsula: a first overview of seeds and fruits from archaeological sites. *Quaternary*  
495 *International* 499: 49–66.
- 496 40. Samuel, D. (2001) Archaeobotanical evidence and analysis. In: S. Berthier, L. Chaix, J.  
497 Studer, O. D’hont, R. Gyselend and D. Samuel, *Peuplement rural et aménagements*  
498 *hydroagricoles dans la moyenne vallée de l’Euphrate fin VIIe–XIXe siècle* (pp. 343–481).  
499 Damascus: Institut français d’études arabes de Damas.
- 500 41. Amichay, O. and Weiss, E. (2020) Chapter 18: The archaeobotanical remains. In: Ben-  
501 Ami, D. and Tchekhanovets, Y., *Jerusalem: Excavations in the Tyropoeon Valley (Givati*  
502 *parking lot) Jerusalem, Volume II—the Byzantine and Early Islamic Periods, Part 2—*  
503 *strata IV–I: the Early Islamic period*. Jerusalem: Israel Antiquities Authority.
- 504 42. Fuks, D., Amichay, O. and Weiss, E. (2020) Innovation or preservation? Abbasid  
505 aubergines, archaeobotany and the Islamic Green Revolution. *Archaeological and*  
506 *Anthropological Sciences* 12(50).
- 507 43. Bar-Oz, G., Weissbrod, L., Erickson-Gini, T., Tepper, Y., Malkinson, D., Benzaquen, M.,  
508 Langgut, D., Dunseth, Z., Butler, D., Shahack-Gross, R., Roskin, Y., Fuks, D., Weiss, E.,  
509 Marom, N., Ktalav, I., Blevis, R., Zohar, I., Farhi, Y., Filatova, A., Gorin-Rosen, Y., Yan,  
510 X. and Boaretto, E. (2019) Ancient trash mounds unravel urban collapse a century before  
511 the end of Byzantine hegemony in the southern Levant. *Proceedings of the National*  
512 *Academy of Sciences, USA* 116(17): 8239–8248.
- 513 44. Tepper, Y., Erickson-Gini, T., Farhi, Y. and Bar-Oz G. 2018. Probing the  
514 Byzantine/Early Islamic Transition in the Negev: The Renewed Shivta Excavations,  
515 2015–2016. *Tel Aviv* 45: 120–152.
- 516 45. Tepper, Y., Weissbrod, L., Erickson-Gini, T. and Bar-Oz, G. (2020) Nizzana – 2017,  
517 Preliminary Report. *Hadashot Arkheologiyot: Excavations and Surveys in Israel*, 132.  
518 [https://www.hadashot-esi.org.il/Report\\_Detail\\_Eng.aspx?id=25717&mag\\_id=128](https://www.hadashot-esi.org.il/Report_Detail_Eng.aspx?id=25717&mag_id=128)
- 519 46. Kedar, Y. (1957) Water and soil from the desert: some ancient agricultural achievements  
520 in the central Negev. *The Geographical Journal* 123: 179–187.
- 521 47. Evenari, M., Shanan, L. and Tadmor, N. (1982) *The Negev: the challenge of a desert*.  
522 Cambridge, Mass.: Harvard University Press.
- 523 48. Tepper, Y., Porat, N. and Bar-Oz, G. (2020) Sustainable farming in the Roman-Byzantine  
524 period: Dating an advanced agriculture system near the site of Shivta, Negev Desert,  
525 Israel. *Journal of Arid Environments* 177: 104–134.
- 526 49. Bruins, H.J., Bithan-Guedj, H. and Svoray, T. (2019) GIS-based hydrological modelling  
527 to assess runoff yields in ancient-agricultural terraced wadi fields (central Negev  
528 desert). *Journal of Arid Environments* 166: 91–107.
- 529 50. Fuks, D., Avni, G. and Bar-Oz, G. (2021) The debate on Negev viticulture and Gaza wine  
530 in Late Antiquity. *Tel-Aviv*, 48(2): 143–170.  
531 <https://doi.org/10.1080/03344355.2021.1968626>
- 532 51. Mayerson, P. (1962) The ancient agricultural regime of Nessana and the Central Negeb.  
533 In: D. Colt (ed.), *Excavations at Nessana, vol. 1* (pp. 211–269). London: William Clowes  
534 and Sons.

- 535 52. Liphshitz, N. (2004) The flora of the Nessana region: past and present. In: Urman, D.  
536 (ed.), *Nessana: excavations and studies, vol. 1* (pp.112–114). Beer Sheva: Ben-Gurion  
537 University of the Negev Press.
- 538 53. Ramsay, J., Tepper, Y., Weinstein-Evron, M., Aharonovich, S., Liphshitz, N., Marom,  
539 N. and Bar-Oz, G. (2016) For the birds: an environmental archaeological analysis of  
540 Byzantine pigeon towers at Shivta (Negev Desert, Israel). *Journal of Archaeological*  
541 *Science: Reports* 9: 718–727.
- 542 54. Fuks, D., Bar-Oz, G., Tepper, Y., Erickson-Gini, T., Langgut, D., Weissbrod, L. and  
543 Weiss, E. (2020) The rise and fall of viticulture in the Negev Highlands during Late  
544 Antiquity: An economic reconstruction from quantitative archaeobotanical and ceramic  
545 data. *Proceedings of the National Academy of Sciences, USA*, 117 (33): 19780–19791.
- 546 55. Tepper Y., Weissbrod L., Fried, T., Marom N., Ramsay J., Weinstein-Evron M.,  
547 Aharonovich S., Liphshitz N., Farhi Y., Yan X., Boaretto E. and Bar-Oz G. (2018)  
548 Pigeon-raising and sustainable agriculture at the fringe of the desert: a view from the  
549 Byzantine village of Sa‘adon, Negev, Israel. *Levant* 50: 91–113.
- 550 56. Fuks, D., Weiss, E., Tepper, Y. and Bar-Oz, G. (2016) Seeds of collapse? Reconstructing  
551 the ancient agricultural economy at Shivta in the Negev, *Antiquity* 90(353).  
552 <https://doi.org/10.15184/aqy.2016.167>.
- 553 57. Dunseth, Z., Fuks, D., Langgut, D., Weiss, E., Butler, D., Yan, X., Boaretto, E. Tepper,  
554 Y., Bar-Oz, G. and Shahack-Gross, R. (2019) Archaeobotanical proxies and  
555 archaeological interpretation: a comparative study of phytoliths, seeds and pollen in dung  
556 pellets and refuse deposits at Early Islamic Shivta, Negev, Israel. *Quaternary Science*  
557 *Reviews*, 211: 166–185. <http://doi.org/10.1016/j.quascirev.2019.03.010>.
- 558 58. Fuks, D. and Dunseth, Z. (2021) Dung in the dumps: what we can learn from multi-proxy  
559 archaeobotanical study of herbivore dung pellets. *Vegetation History and Archaeobotany*,  
560 30, 137–153. <https://doi.org/10.1007/s00334-020-00806-x>
- 561 59. Langgut, D., Tepper, Y., Benzaquen, M., Erickson-Gini, T. and Bar-Oz, G. (2021)  
562 Environment and horticulture in the Byzantine Negev Desert, Israel: Sustainability,  
563 prosperity and enigmatic decline. *Quaternary International*.  
564 <https://doi.org/10.1016/j.quaint.2020.08.056>
- 565 60. Halevy, D. (2016) Drinking (Beer) from the sea of Gaza: The rise and fall of Gaza’s  
566 maritime trade in the late Ottoman period. *Ha-Mizrah ha-Hadash*, 55: 35–59.
- 567 61. Tepper, Y., Porat, N., Langgut, D., Barazani, O., Bajpai, P.K., Dag, A., Ehrlich, Y.,  
568 Boaretto, E. and Bar-Oz, G. (2022). Relict olive trees at runoff agriculture remains in  
569 Wadi Zetan, Negev Desert, Israel. *Journal of Archaeological Science: Reports*, 41,  
570 103302.
- 571 62. Kislev, M.E. (1990) Extinction of *Acacia nilotica* in Israel. In: Bottema, S., Entjes-  
572 Nieborg, G. and van Zeist, W. (eds), *Man’s role in the shaping of the Eastern*  
573 *Mediterranean landscape: Proceedings of the symposium on the impact of ancient Man*  
574 *on the landscape of the E Med Region & the Near East, Groningen, March 1989* (p. 307–  
575 318). Groningen: CRC Press.
- 576 63. Feliks, Y. 2008. ‘Rice’. In: *Encyclopedia Judaica*. Accessed online 20-1-2021 at:  
577 <https://www.jewishvirtuallibrary.org/rice>
- 578 64. Van der Veen, M. and Morales, J. (2011) Chapter 3: Summer crops — from trade to  
579 innovation. In: Van der Veen, M., *Consumption, trade and innovation: exploring the*  
580 *botanical remains from the Roman and Islamic ports at Quseir al-Qadim, Egypt* (pp. 75–  
581 119). Frankfurt: Africa Magna Verlag.
- 582 65. Van der Veen, M. and Hamilton-Dyer, S. (1998) A life of luxury in the desert? The food  
583 and fodder supply to Mons Claudianus. *Journal of Roman Archaeology* 11: 101–116.

- 584 66. Vermeeren, C. and Cappers, R.T.J. (2002) Ethnographic and archaeobotanical evidence  
585 of local cultivation of plants in Roman Berenike and Shenshef (Red Sea coast,  
586 Egypt), *BIAxiaal*: 1–14.
- 587 67. Bouby, L. and Marinval, P. (2004) Fruits and seeds from Roman cremations in Limagne  
588 (Massif Central) and the spatial variability of plant offerings in France. *Journal of*  
589 *Archaeological Science* 31(1): 77–86.
- 590 68. Bosi, G., Castiglioni, E., Rinaldi, R., Mazzanti, M., Marchesini, M. and Rottoli, M.  
591 (2020). Archaeobotanical evidence of food plants in Northern Italy during the Roman  
592 period. *Vegetation History and Archaeobotany*. [https://doi.org/10.1007/s00334-020-](https://doi.org/10.1007/s00334-020-00772-4)  
593 [00772-4](https://doi.org/10.1007/s00334-020-00772-4)
- 594 69. Langgut, D. (2022) Prestigious Early Roman gardens across the Empire: The significance  
595 of gardens and horticultural trends evidenced by pollen. *Palynology* 46: 1–29.
- 596 70. Bouchaud, C., Jacquat, C., & Martinoli, D. (2017). Landscape use and fruit cultivation in  
597 Petra (Jordan) from Early Nabataean to Byzantine times (2nd century BC–5th century  
598 AD). *Vegetation history and archaeobotany*, 26(2), 223-244.
- 599 71. Kroll, H. (2005). Literature on archaeological remains of cultivated plants 1981–2004.  
600 URL: <http://www.archaeobotany.de/database.html>
- 601 72. Riehl, S. and Kümmel, C. (2005). Archaeobotanical database of Eastern Mediterranean  
602 and Near Eastern sites. <http://www.cuminum.de/archaeobotany/>
- 603 73. Núñez D.R., Séiquer, M.G., de Castro, C.O., Ariza, F.A. (2011). Plants and humans in the  
604 Near East and the Caucasus: ancient and traditional uses of plants as food and medicine, a  
605 diachronic ethnobotanical review (Armenia, Azerbaijan, Georgia, Iran, Iraq, Lebanon,  
606 Syria, and Turkey), vols. 1–2. Murcia: Editum.
- 607 74. Caracuta, V., Vardi, J., Paz, Y., & Boaretto, E. (2017). Farming legumes in the pre-  
608 pottery Neolithic: New discoveries from the site of Ahihud (Israel). *PloS one*, 12(5),  
609 e0177859.
- 610 75. Feldman, M., & Kislev, M. E. (2007) Domestication of emmer wheat and evolution of  
611 free-threshing tetraploid wheat. *Israel Journal of Plant Sciences*, 55(3-4), 207-221.
- 612 76. Langgut, D., Cheddadi, R., Carrión, J.S., Cavanagh, M., Colombaroli, D., Eastwood, W.  
613 J., Greenberg R., Litt, T., Mercuri A.M., Miebach, A., Roberts, N., Woldring, H. and  
614 Woodbridge, J. (2019) The origin and spread of olive cultivation in the Mediterranean  
615 Basin: The fossil pollen evidence. *The Holocene*, 29(5), 902-922.
- 616 77. Weiss, E. (2015) ‘Beginnings of fruit growing in the Old World’—two generations  
617 later. *Israel Journal of Plant Sciences* 62(1–2): 75–85.
- 618 78. Melamed, Y. (2002) Chalcolithic and Hellenistic plant remains from Cave V/49  
619 (Northern Judean Desert). *Atiqot* 41(2): 101-115.
- 620 79. Kislev, M.E., Artzy, M. & Marcus, E. (1993) Import of an Aegean food plant to the  
621 middle bronze IIA coastal site in Israel. *Levant* 25(1): 145-154.  
622 <https://doi.org/10.1179/lev.1993.25.1.145>
- 623 80. Langgut, D. (2015) Prestigious fruit trees in ancient Israel: first palynological evidence  
624 for growing *Juglans regia* and *Citrus medica*. *Israel Journal of Plant Sciences* 62(1-2):  
625 98-110.
- 626 81. Weiss, E., Mahler-Slasky, Y., Melamed, Y., Lederman, Z., Bunimovitz, S., Bubel, S., &  
627 Manor, D. (2019). Foreign Food Plants as Prestigious Gifts: The Archaeobotany of the  
628 Amarna Age Palace at Tel Beth-Shemesh, Israel. *Bulletin of the American Schools of*  
629 *Oriental Research*, 381(1): 83-105.
- 630 82. Kislev, M.E. and Simchoni, O. (2009) Relict plant remains in the ‘Caves of the Spear’.  
631 *Judea & Samaria Research Studies* 18: 165–176. (Hebrew with English summary).
- 632 83. Kislev, M. E. (1988). *Pinus pinea* in agriculture, culture and cult. In: H. Küster, U.  
633 Körber-Gröhne, L. Baden-Württemberg (eds), *Der Prähistorische Mensch und seine*

- 634 *Umwelt : Festschrift für Udelgard Körber-Grohne zum 65 Geburtstag* (pp. 73–79).  
635 Stuttgart: Kommissionsverlag K. Theiss.
- 636 84. Tabak, Y. (2006) Agricultural prosperity in Roman Israel confirmed by Masada  
637 archeobotanic finds. Unpublished PhD dissertation. Ramat-Gan: Bar-Ilan University.
- 638 85. Hartman, A. and Kislev, M.E. (1998) Plant remains from the dwellers of the Ketef Yeriho  
639 caves at the end of the Bar-Kokhba revolt. In: Eshel, H., Amit, D. and Porat, R. (eds),  
640 Refuge caves of the Bar Kokhba revolt (pp. 153-168). Tel Aviv: Israel Exploration  
641 Society.
- 642
- 643



644 *Supplementary Tables*

645 *Supplementary Table 1. Proposed IGR crops (according to Watson 1983 [16])*

| Category   | Latin name                                        | English common name |
|------------|---------------------------------------------------|---------------------|
| cereal     | <i>Sorghum bicolor</i> (L.) Moench.               | sorghum             |
| cereal     | <i>Oryza sativa</i> L.                            | rice                |
| cereal     | <i>Triticum durum</i> Desf.                       | hard wheat          |
| textile    | <i>Gossypium arboreum/herbaceum</i> L.            | Old World cotton    |
| tree fruit | <i>Citrus aurantium</i> L.                        | sour orange         |
| tree fruit | <i>Citrus limon</i> L.                            | lemon               |
| tree fruit | <i>Citrus aurantifolia</i> Swing.                 | lime                |
| tree fruit | <i>Citrus grandis</i> L.                          | shaddock            |
| tree fruit | <i>Musa sapientum/paradisica</i> L.               | banana/plantain     |
| tree fruit | <i>Cocos nucifera</i> L.                          | coconut             |
| tree fruit | <i>Mangifera indica</i> L.                        | mango               |
| vegetable  | <i>Citrullus lanatus</i> (Thumb.) Mansf.          | watermelon          |
| vegetable  | <i>Spinacia oleracea</i> L.                       | spinach             |
| vegetable  | <i>Cynara cardunculus</i> L. var. <i>scolymus</i> | artichoke           |
| vegetable  | <i>Colocasia antiquorum</i> Schott.               | colocasia           |
| vegetable  | <i>Solanum melongena</i> L.                       | eggplant            |
| condiment  | <i>Saccharum officinarum</i> L.                   | sugar cane          |

646 *Supplementary Table 2. Proposed RAD crops (see main text for discussion and sources)*

| Category       | Latin name                              | English common name |
|----------------|-----------------------------------------|---------------------|
| cereal         | <i>Oryza sativa</i> L.                  | rice                |
| cereal         | <i>Sorghum bicolor</i> (L.) Moench.     | sorghum             |
| legume         | <i>Lupinus albus</i> L.                 | white lupine        |
| textile        | <i>Cannabis sativa</i> L.               | cannabis            |
| tree fruit/nut | <i>Ceratonia siliqua</i> L.             | carob               |
| tree fruit/nut | <i>Morus nigra</i> L.                   | black mulberry      |
| tree fruit/nut | <i>Prunus persica</i> (L.) Batsch       | peach               |
| tree fruit/nut | <i>Pyrus communis</i> L.                | pear                |
| tree fruit/nut | <i>Prunus domestica</i> L.              | plum                |
| tree fruit/nut | <i>Prunus armeniaca</i> L.              | apricot             |
| tree fruit/nut | <i>Prunus avium/cerasus</i>             | cherry              |
| tree fruit/nut | <i>Pistacia vera</i> L.                 | pistachio nut       |
| tree fruit/nut | <i>Pinus pinea</i> L.                   | pine nut            |
| tree fruit/nut | <i>Corylus avellana</i> L.              | hazelnut            |
| tree fruit/nut | <i>Ziziphus jujube</i> Mill.            | jujuba              |
| tree fruit/nut | <i>Citrus x limon</i> (L.) Osbeck       | lemon               |
| tree fruit/nut | <i>Cocos nucifera</i> L.                | coconut             |
| vegetable      | <i>Cucumis melo</i> convar. <i>melo</i> | muskmelon           |

647

648 *Supplementary Table 3. Pre-1<sup>st</sup> mill. CE Eastern Mediterranean introductions/domestications*

| Period                    | Category       | Latin name                                                    | English common name |
|---------------------------|----------------|---------------------------------------------------------------|---------------------|
| Neolithic                 | cereal         | <i>Triticum monococcum</i> L. subsp. <i>monococcum</i>        | einkorn wheat       |
| Neolithic                 | cereal         | <i>T. turgidum</i> L. subsp. <i>dicoccum</i> (Schrank) Thell. | emmer wheat         |
| Neolithic                 | cereal         | <i>Hordeum vulgare</i> subsp. <i>vulgare</i>                  | barley              |
| Neolithic                 | cereal         | <i>Lens culinaris</i> L.                                      | lentil              |
| Neolithic                 | legume         | <i>Pisum sativum</i> L.                                       | pea                 |
| Neolithic                 | legume         | <i>Cicer arietinum</i> L. subsp. <i>arietinum</i>             | chickpea            |
| Neolithic                 | legume         | <i>Vicia ervilia</i> (L.) Willd.                              | bitter vetch        |
| Neolithic                 | legume         | <i>Vicia faba</i> L.                                          | fava bean           |
| Neolithic                 | fiber/oil      | <i>Linum usitatissimum</i> L.                                 | flax                |
| Chalcolithic-Early Bronze | tree fruit/nut | <i>Olea europaea</i> L.                                       | olive               |
| Chalcolithic-Early Bronze | tree fruit/nut | <i>Vitis vinifera</i> L.                                      | grapevine           |
| Chalcolithic-Early Bronze | tree fruit/nut | <i>Ficus carica</i> L.                                        | fig                 |
| Chalcolithic-Early Bronze | tree fruit/nut | <i>Ficus sycomorus</i> L.                                     | sycomore            |
| Chalcolithic-Early Bronze | tree fruit/nut | <i>Phoenix dactylifera</i> L.                                 | date                |
| Chalcolithic-Early Bronze | tree fruit/nut | <i>Punica granatum</i> L.                                     | pomegranate         |
| Chalcolithic-Early Bronze | tree fruit/nut | <i>Prunus amygdalus</i> Batsch.                               | almond              |
| Bronze-Iron Age           | tree fruit/nut | <i>Juglans regia</i> L.                                       | walnut              |
| Bronze-Iron Age           | tree fruit/nut | <i>Citrus medica</i> L.                                       | citron              |
| Bronze-Iron Age           | cereal         | <i>Panicum miliaceum</i> L.                                   | broomcorn millet    |
| Bronze-Iron Age           | cereal         | <i>Setaria italica</i> (L.) P. Beauv.                         | foxtail millet      |
| Bronze-Iron Age           | legume         | <i>Lathyrus clymenum</i> L.                                   | Spanish vetchling   |
| Bronze-Iron Age           | legume         | <i>Lathyrus sativus/cicera</i> L.                             | grass pea           |
| Bronze-Iron Age           | legume         | <i>Trigonella foenum-graecum</i> L.                           | fenugreek           |
| Bronze-Iron Age           | condiment/oil  | <i>Papaver somniferum</i> L.                                  | opium poppy         |
| Bronze-Iron Age           | condiment/oil  | <i>Nigella sativa</i> L.                                      | black cumin         |
| Bronze-Iron Age           | condiment/oil  | <i>Sesamum indicum</i> L.                                     | sesame              |
| Bronze-Iron Age           | vegetable      | <i>Citrullus lanatus</i> (Thunb.) Matsum. & Nakai             | watermelon          |

649

650 *Based primarily on Zohary et al. 2012 [3], this list includes only species whose evidence for domestication/introduction is*  
 651 *clear. This and the preceding Supplementary tables are not meant as exhaustive lists but rather as a basis against which the*  
 652 *Negev Highlands crop plant assemblage can be compared.*

653 *Supplementary Table 4. Carpological<sup>1</sup> plant remains from Negev Highland middens*

| Category             | Latin name                                                | Common name                     |
|----------------------|-----------------------------------------------------------|---------------------------------|
| <b>Cereals</b>       | <i>Hordeum vulgare</i> subsp. <i>hexastichum</i> (hulled) | six-row hulled barley           |
|                      | <i>Hordeum vulgare</i> subsp. <i>distichum</i> (hulled)   | two-row hulled barley           |
|                      | <i>Triticum turgidum</i> s.l. (free-threshing)            | free-threshing tetraploid wheat |
|                      | <i>Triticum aestivum</i> (free-threshing)                 | free-threshing hexaploid wheat  |
| <b>Legumes</b>       | <i>Lens culinaris</i>                                     | lentil                          |
|                      | <i>Vicia ervilia</i>                                      | bitter vetch                    |
|                      | <i>Vicia faba</i>                                         | broad beans                     |
|                      | <i>Lathyrus clymenum</i>                                  | Spanish vetchling               |
|                      | <i>Lupinus albus</i>                                      | white lupine                    |
|                      | <i>Trigonella foenum-graecum</i>                          | fenugreek                       |
| <b>Fruits</b>        | <i>Vitis vinifera</i>                                     | common grape                    |
|                      | <i>Ficus carica</i>                                       | common fig                      |
|                      | <i>Phoenix dactylifera</i>                                | date palm                       |
|                      | <i>Olea europaea</i>                                      | European olive                  |
|                      | <i>Punica granatum</i>                                    | pomegranate                     |
|                      | <i>Ceratonia siliqua</i>                                  | carob                           |
|                      | <i>Prunus persica</i>                                     | peach                           |
|                      | <i>Prunus</i> subgen. <i>Cerasus/Prunus</i>               | plum/cherry                     |
|                      | <i>Ziziphus jujuba</i>                                    | jujuba                          |
|                      | <b>Nuts</b>                                               | <i>Prunus amygdalus</i>         |
| <i>Pinus pinea</i>   |                                                           | stone pine                      |
| <i>Pistacia vera</i> |                                                           | pistachio nut                   |
| <i>Juglans regia</i> |                                                           | Persian walnut                  |
| <b>Vegetable</b>     | <i>Solanum melongena</i>                                  | aubergine                       |
| <b>Wild</b>          | <i>Vachellia nilotica</i> <sup>2</sup>                    | Nile acacia                     |
|                      | <i>Adonis dentata</i>                                     | toothed pheasant's eye          |
|                      | <i>Aizoon hispanicum</i>                                  | Spanish aizoon                  |
|                      | <i>Ajuga iva</i>                                          | herb ivy                        |
|                      | <i>Ammi majus/visnaga</i>                                 | bishop's weed                   |
|                      | <i>Anagallis arvensis</i>                                 | scarlet pimpernel               |
|                      | <i>Anagyris foetida</i>                                   | Mediterranean stinkbush         |
|                      | <i>Andrachne telephioides</i>                             | bastard orpine                  |
|                      | <i>Anthemis pseudocotula</i>                              | chamomile                       |
|                      | <i>Arnebia decumbens</i>                                  | Arabian primrose                |
|                      | <i>Asphodelus tenuifolia/fistulosus</i>                   | onionweed                       |
|                      | <i>Astragalus hamosus/arpilobus</i>                       | milkvetch                       |
|                      | <i>Atriplex glauca</i>                                    | waxy saltbush                   |
|                      | <i>Avena barbata</i>                                      | slender wild oat                |
|                      | <i>Avena sterilis</i>                                     | animated oat                    |
|                      | <i>Bassia muricata</i>                                    | smotherweed                     |
|                      | <i>Bellevalia</i> sp.                                     | Roman squill                    |
|                      | <i>Beta vulgaris</i>                                      | beet                            |
|                      | <i>Bifora testiculata</i>                                 | European bishop                 |
|                      | <i>Brachypodium distachyon</i>                            | purple false brome              |
| <i>Bromus</i> type   | brome (type)                                              |                                 |

<sup>1</sup> Includes taxa identified by other preserved plant parts, e.g. perianth, rachis fragments, segmented stems/leaves.

<sup>2</sup> We take this Egyptian wild plant to have been cultivated or imported into the Negev Highlands (see Results).

|                                                                                |                                  |
|--------------------------------------------------------------------------------|----------------------------------|
| <i>Buglossoides tenuiflora</i>                                                 | corn gromwell                    |
| <i>Bupleurum lancifolium</i>                                                   | lanceleaf thorum wax             |
| <i>Calendula</i> sp.                                                           | calendula                        |
| <i>Cardaria draba</i>                                                          | hoary cress                      |
| <i>Carrichtera annua</i>                                                       | Ward's weed                      |
| <i>Carthamus</i> sp.                                                           | thistle                          |
| <i>Caylusea hexagyna</i>                                                       |                                  |
| <i>Centaurea</i> sp.                                                           | knapweed                         |
| <i>Cephalaria joppensis</i>                                                    | Jaffa scabious                   |
| <i>Chenopodium murale</i>                                                      | nettleleaf goosefoot             |
| <i>Cichorium endivia</i>                                                       | endive                           |
| <i>Citrullus colocynthis</i>                                                   | colocynth                        |
| <i>Convolvulus</i> cf. <i>arvensis</i>                                         | bindweed                         |
| <i>Coriandrum sativum</i>                                                      | coriander                        |
| <i>Coronilla</i> cf. <i>repanda</i>                                            |                                  |
| cf. <i>Crassula</i> / <i>Sedum</i>                                             | stonecrops                       |
| <i>Cutandia memphitica/dichotoma</i>                                           | cutandia grass                   |
| <i>Cynodon dactylon</i>                                                        | Bermuda grass                    |
| <i>Daucus</i> / <i>Torilis</i>                                                 | wildcarrot/hedgeparsley          |
| <i>Echiochilon fruticosum</i>                                                  | bushy bugloss                    |
| <i>Echium</i> cf. <i>angustifolium</i>                                         | bugloss                          |
| <i>Emex spinosa</i>                                                            | devil's thorn                    |
| <i>Erucaria microcarpa</i>                                                     | pink mustard                     |
| <i>Erucaria pinnata</i>                                                        | pink mustard                     |
| <i>Euphorbia falcata</i>                                                       | sickle spurge                    |
| <i>Fagonia</i> sp.                                                             | fagonbush                        |
| <i>Fumaria parviflora</i>                                                      | fineleaf fumitory                |
| <i>Galium aparine</i>                                                          | cleavers                         |
| <i>Gastrocotyle hispida</i>                                                    | hairy bugloss                    |
| <i>Glaucium arabicum</i>                                                       | horned poppy                     |
| <i>Glebionis coronaria</i>                                                     | garland chrysanthemum            |
| <i>Gypsophila capillaris</i>                                                   | desert baby's breath             |
| <i>Gypsophila pilosa</i>                                                       | Turkish baby's breath            |
| <i>Haplophyllum</i> cf. <i>tuberculatum</i>                                    | plant of the mosquito            |
| <i>Hedysarum spinosissimum</i>                                                 | spiny sulla                      |
| <i>Heliotropium</i> sp.                                                        | heliotrope                       |
| <i>Hippocrepis unisiliquosa</i>                                                | single-flowered horseshoe vetch  |
| <i>Hordeum glaucum</i>                                                         | wall barley                      |
| <i>Hordeum marinum/hystrix</i>                                                 | sea/Mediterranean barley         |
| <i>Hordeum vulgare</i> subsp. <i>spontaneum</i>                                | wild barley                      |
| <i>Hyoscyamus reticulatus</i>                                                  | henbane                          |
| cf. <i>Lathyrus aphaca</i>                                                     | yellow vetchling                 |
| cf. <i>Lathyrus blepharicarpos</i>                                             | ciliate vetchling                |
| <i>Lathyrus hierosolymitanus</i>                                               | Jerusalem vetchling              |
| <i>Lathyrus marmoratus</i> cf. <i>Vicia narbonensis</i> wild cf. <i>edible</i> | vetchling cf. purple broad vetch |
| <i>Lathyrus</i> sect. <i>cicercula</i>                                         | vetchling                        |
| cf. <i>Lavandula coronopifolia</i>                                             | stagshorn lavender               |
| Lithospermeae                                                                  |                                  |
| <i>Lolium rigidum</i>                                                          | rigid ryegrass                   |
| <i>Lolium temulentum</i>                                                       | darnel ryegrass                  |

|                                                |                              |
|------------------------------------------------|------------------------------|
| <i>cf. Lotus peregrinus</i>                    | bird's foot trefoil          |
| <i>Malva aegyptica</i>                         | Egyptian mallow              |
| <i>Malva parviflora</i>                        | cheeseweed mallow            |
| <i>Medicago astroites</i>                      | medick                       |
| <i>Medicago polymorpha/marina</i>              | bur clover/sea medick        |
| <i>Medicago tuberculata</i>                    | medick                       |
| <i>Melilotus sulcatus</i>                      | furrowed melilot             |
| <i>Mesembryanthemum nodiflorum</i>             | slenderleaf iceplant         |
| <i>Moltkiopsis ciliata</i>                     | callous-leaved gromwell      |
| <i>Neslia apiculata</i>                        | ball mustard                 |
| <i>Nonea echioides/melanocarpa</i>             | monkswort                    |
| <i>Papaver</i> sp.                             | poppy                        |
| <i>Peganum harmala</i>                         | wild rue                     |
| <i>Phalaris minor</i>                          | small canary grass           |
| <i>Phalaris paradoxa</i>                       | Mediterranean canary grass   |
| <i>Picris</i> sp.                              | oxtongue                     |
| <i>cf. Pinus halepensis</i>                    | cf. Aleppo pine              |
| <i>Pistacia atlantica</i>                      | atlas pistachio              |
| <i>Plantago chamaepsyllium/notata</i>          | plantain                     |
| <i>Plantago ovata</i>                          | blond plantain               |
| <i>Pteranthus dichotomus</i>                   |                              |
| <i>Pulicaria incisa</i>                        |                              |
| <i>Raphanus raphanistrum</i>                   | wild radish                  |
| <i>Rapistrum rugosum</i>                       | annual bastardcabbage        |
| <i>Reseda muricata</i>                         | mignonette                   |
| <i>cf. Rhus coriaria</i>                       | cf. elm-leaved sumach        |
| <i>Rumex</i> sp.                               | dock                         |
| Salsoleae                                      | saltwort                     |
| <i>Scorpiurus muricatus</i>                    | prickly scorpion's-tail      |
| <i>Silene colorata/decipiens</i>               | catchfly                     |
| <i>Solanum villosum/nigrum</i>                 | hairy/black nightshade       |
| <i>Spergula fallax</i>                         | spurry                       |
| <i>Suaeda</i> sp.                              | seepweed                     |
| <i>Tamarix aphylla</i>                         | athel tamarisk               |
| <i>Teucrium capitatum</i>                      | cat-thyme germander          |
| <i>Thesium humile/bergeri</i>                  | bastard toadflax             |
| <i>Thymelaea</i> cf. <i>passerina/gussonei</i> | mezereon/sparrow-wort        |
| <i>Thymelaea hirsuta</i>                       | shaggy sparrow-wort          |
| <i>Trifolium campestre/glanduliferum</i>       | field/glandular clover       |
| <i>Trifolium</i> sp.                           | clover                       |
| <i>Trigonella arabica</i>                      | Arabian fenugreek            |
| <i>Vaccaria hispanica</i>                      | cow cockle                   |
| <i>Verbascum</i> sp.                           | mullein                      |
| <i>Vicia hybrida/sericocarpa</i>               | vetch                        |
| <i>Vicia palaestina/sativa</i>                 | Palestine/common vetch       |
| <i>Vicia peregrina/narbonensis</i>             | wandering/purple broad vetch |
| <i>Vicia sativa</i>                            | common vetch                 |
| <i>Vicia villosa/tenuifolia</i>                | hairy/fine-leaved vetch      |
| <i>Zilla spinosa</i>                           | spiny zilla                  |

654 *Supplementary Table 5. Identified wood and charcoal taxa from Shivta, Nessana and Elusa*

| Category                       | Taxon                                          | English common name      | SVT | NZN | HLZ |
|--------------------------------|------------------------------------------------|--------------------------|-----|-----|-----|
| Fruit trees                    | <i>Ficus carica</i>                            | common fig               | +   | +   | +   |
|                                | <i>Ficus sycomorus</i>                         | Sycomore fig             | -   | +   | +   |
|                                | <i>Hyphaene thebaica</i>                       | doum palm                | +   | +   | -   |
|                                | <i>Olea europaea</i>                           | olive                    | +   | -   | +   |
|                                | <i>Phoenix dactylifera</i>                     | date palm                | +   | -   | -   |
|                                | <i>Prunus</i> spp. ( <i>dulcis/armeniaca</i> ) | plum/apricot             | +   | +   | -   |
|                                | <i>Punica granatum</i>                         | pomegranate              | -   | +   | -   |
|                                | <i>Vitis vinifera</i>                          | grapevine                | +   | +   | -   |
| Exotic trees                   | <i>Buxus sempervirens</i>                      | boxwood                  | +   | +   | -   |
|                                | <i>Cedrus libani</i>                           | cedar of Lebanon         | +   | +   | -   |
|                                | <i>Fraxinus excelsior</i>                      | European ash             | -   | +   | -   |
| Desert trees and shrubs        | <i>Calotropis procera</i>                      | apple of Sodom           | +   | +   | -   |
|                                | <i>Capparis spinosa</i>                        | caper bush               | +   | -   | -   |
|                                | <i>Fagonia mollis</i>                          | fagonia                  | -   | +   | -   |
|                                | <i>Juniperus phoenicea</i>                     | Phoenician juniper       | +   | +   | -   |
|                                | <i>Lycium</i> spp.                             | boxthorn                 | +   | +   | +   |
|                                | <i>Moringa peregrina</i>                       | Ben tree                 | +   | -   | -   |
|                                | <i>Pistacia atlantica</i>                      | Persian turpentine       | +   | +   | -   |
|                                | <i>Populus/Salix</i>                           | poplar/willow            | -   | +   | -   |
|                                | <i>Retama raetam</i>                           | white broom              | +   | +   | +   |
|                                | <i>Rhamnus</i> spp.                            | buckthorn                | +   | +   | +   |
|                                | <i>Salsola tetrandra</i>                       | saltwort [tetrandra]     | +   | -   | -   |
|                                | <i>Salsola vermiculata</i>                     | Mediterranean saltwort   | +   | +   | -   |
|                                | <i>Tamarix</i> spp.                            | tamarisk                 | +   | +   | +   |
|                                | <i>Ziziphus/Paliurus</i>                       | jujube/Jerusalem thorn   | +   | +   | +   |
| <i>Zygophyllum dumosum</i>     | bushy bean caper                               | +                        | +   | -   |     |
| Mediterranean trees and shrubs | <i>Crataegus</i> spp.                          | hawthorn group/Maloideae | +   | +   | +   |
|                                | <i>Cupressus sempervirens</i>                  | Italian cypress          | +   | +   | +   |
|                                | <i>Myrtus communis</i>                         | true myrtle              | -   | +   | -   |
|                                | <i>Pinus halepensis</i>                        | Aleppo pine              | +   | +   | +   |
|                                | <i>Pistacia palaestina</i>                     | terebinth                | +   | +   | +   |
|                                | <i>Platanus orientalis</i>                     | oriental plane           | -   | +   | +   |
|                                | <i>Quercus calliprinos</i>                     | Kermes oak               | +   | -   | +   |
|                                | <i>Vitex agnus-castus</i>                      | chaste tree              | -   | +   | -   |

655 *Data for Shivta and Nessana derive from Langgut et al. 2021, Table 1 [59]; Data for Elusa are based*  
 656 *on Bar-Oz et al. 2019, Table S8 [43].*

657 *Supplementary Table 6. Identified pollen from Shivta reservoirs and garden*

| <b>Taxon</b>                  | <b>English common name</b> | <b>S reservoir</b> | <b>N reservoir</b> | <b>N church</b> |
|-------------------------------|----------------------------|--------------------|--------------------|-----------------|
| <i>Artemisia</i>              | sagebrush                  | +                  | +                  | +               |
| <i>Asphodelus</i>             | asphodels                  | -                  | +                  | +               |
| Asteraceae Asteroideae type   | aster-like                 | +                  | +                  | +               |
| Asteraceae Cichorioideae type | dandelion-like             | +                  | +                  | +               |
| Brassicaceae                  | mustards                   | +                  | +                  | +               |
| <i>Bunium</i> type            | cabbage family             | +                  | +                  | +               |
| <i>Calendula</i>              | marigold                   | +                  | -                  | -               |
| <i>Carduus</i>                | plumeless thistles         | -                  | -                  | -               |
| <i>Carthamus</i>              | distaff thistle            | +                  | -                  | +               |
| Caryophyllaceae               | pinks                      | -                  | +                  | +               |
| <i>Cedrus</i>                 | cedar                      | +                  | +                  | +               |
| <i>Centaurea</i>              | knapweeds                  | -                  | +                  | +               |
| <i>Ceratonia siliqua</i>      | carob                      | +                  | -                  | +               |
| Cerealina                     | cereals                    | +                  | +                  | +               |
| Chenopodiaceae                | chenopods                  | +                  | +                  | +               |
| <i>Cistus</i>                 | rock rose                  | +                  | +                  | -               |
| <i>Corylus</i>                | hazel                      | +                  | -                  | +               |
| <i>Crocus</i>                 | crocus                     | -                  | +                  | -               |
| Cyperaceae                    | sedges                     | +                  | +                  | +               |
| <i>Ephedra</i>                | Mormon-tea                 | +                  | +                  | +               |
| Fabaceae                      | legumes                    | +                  | +                  | +               |
| <i>Ferula</i> type            |                            | -                  | +                  | +               |
| <i>Fraxinus</i>               | ash                        | +                  | +                  | +               |
| <i>Geranium</i>               | cranesbill                 | +                  | +                  | +               |
| Juniperus/Cupressus           | juniper/cypress            | +                  | +                  | +               |
| <i>Lemna</i>                  | duckweeds                  | -                  | +                  | -               |
| Liliaceae                     | lilies                     | +                  | +                  | +               |
| Malvaceae                     | mallows                    | -                  | +                  | +               |
| <i>Myrtus communis</i>        | true myrtle                | -                  | -                  | +               |
| <i>Nymphaea</i>               | water lilies               | +                  | +                  | +               |
| <i>Olea europaea</i>          | olive                      | +                  | +                  | +               |
| <i>Phoenix dactylifera</i>    | date palm                  | +                  | +                  | +               |
| Pinaceae                      | pine family                | -                  | +                  | +               |
| <i>Pinus</i>                  | pine                       | +                  | +                  | +               |
| Plantaginaceae                | plantains                  | +                  | +                  | +               |
| Poaceae                       | grasses                    | +                  | +                  | +               |
| Polygonaceae                  | knotweeds                  | +                  | +                  | +               |
| <i>Potamogeton</i>            | pondweed                   | -                  | +                  | -               |
| Ranunculaceae                 | buttercup                  | -                  | +                  | -               |
| <i>Rumex</i>                  | docks                      | -                  | -                  | +               |
| <i>Salix</i>                  | willow                     | +                  | +                  | +               |
| <i>Scilla</i>                 | squills                    | -                  | +                  | -               |
| <i>Sparganium</i>             | bur-reeds                  | -                  | -                  | +               |
| <i>Tamarix</i>                | tamarisk                   | -                  | -                  | +               |
| Thymelaeaceae                 | sparrow-wort               | +                  | +                  | +               |
| <i>Ulmus</i>                  | elm                        | -                  | +                  | -               |
| <i>Vitis vinifera</i>         | grapevine                  | +                  | +                  | +               |
| <i>Zygophyllum</i>            | bean-caper                 | -                  | -                  | +               |

## 658 **Supplementary Information**

### 659 *Field and laboratory extraction methods*

660 Eleven middens from the three sites, Elusa, Shivta and Nessana, were excavated at  
661 approximately 10 cm height intervals to ensure chronological control (Figure 1 of main text).  
662 Loci and baskets were assigned by a combination of stratigraphy and sediment features  
663 during excavation. A three-pronged sifting strategy was adopted to maximize retrieval of  
664 artifacts and biological remains, while enabling complementary resolutions of analysis. All  
665 excavated material was sifted at one of three different levels, corresponding to sieve sizes: (1)  
666 Most excavated sediment was dry screened on site through 5 mm sieves. (2) Wet screening  
667 through 1 mm mesh was performed on two buckets (~20 l) from each excavated locus-basket.  
668 (3) One additional bucket from each locus-basket was set aside for fine screening. Selected  
669 buckets of sample sediments were divided into 3-liter subsamples which were processed by  
670 flotation or fine-mesh dry screening, and sieved using graduated sieves at 4 mm, 2 mm, 1  
671 mm, 0.5 mm and sometimes 0.3 mm mesh sizes. One additional source of identified seeds  
672 was an assemblage of dissected charred dung pellets from two of the middens (Dunseth et al.  
673 2019).

674 For ease of reference, (1) and (2) above are collectively referred to as *course sift samples* and  
675 (3) is referred to as *fine sift samples*. Due to the high volume of samples and the extremely  
676 high concentration of seeds within them, a subsampling strategy based on sieve mesh size  
677 was adopted for the fine sift samples. All flotation light fraction and heavy residues were  
678 sorted at the  $\geq 2$  mm mesh size. Light fraction was studied at 1 mm and 0.5 mm mesh sizes  
679 for select samples, such that at least three 1 mm samples and one 0.5 mm sample were sorted  
680 for each period on each site. Fine sift samples were sorted using an Olympus SZX9 stereo  
681 microscope. Course sifted samples were sorted by volunteers and archaeology students  
682 during the excavation and thereafter. Seed finds from the course sifting were visually  
683 examined with aid of a stereo microscope, and rare specimens taken to the Bar-Ilan  
684 University Archaeobotany Lab for identification.

685 On-site screening through 5mm sieves enabled very large volumes of sediment to be screened  
686 – nearly all excavated sediments were sifted in this way. As a result, course sifting  
687 demonstrated the ubiquity of dates and olives in all sites and periods, which would have been  
688 missed from fine sifting only. It also allowed for the discovery of less common large-seeded  
689 species; cherry/plum, pistachio, walnut, jujuba, fava bean and white lupine would have been



690 missed entirely by exclusive fine sifting with its smaller sample volumes. This is reflected in  
691 the shorter species list in Table 2 of the main text, which records fine-sift retrieval only, in  
692 comparison with Table 1, which records course sift and fine sift retrieval. Since the same  
693 positive bias for retrieval of large seeds by 5mm sieves applies to both olive pits and date  
694 stones on one hand and those of cherry/plum, pistachio, walnut and jujuba on the other, this  
695 level of sifting facilitated the distinction between staple fruit crops and luxury/supplementary  
696 ones.

697 Wet screening through 1 mm mesh also allowed for processing of a greater sample volume  
698 (up to 20 l per locus-basket) than for the fine sift samples (3 l per locus-basket), providing  
699 additional qualitative and quantitative data for most of the major domesticated plant seeds.  
700 Ratios of cereal grains to grape pips from wet screening and fine sifting were shown to be  
701 equivalent, enabling wet-screened samples to complement fine-sifted samples in quantitative  
702 analysis (Fuks et al. 2020). Wet screening through 1 mm mesh and sorting by volunteers is a  
703 cost-effective method for discovering the main domesticated plant species on site, but it  
704 provides incomplete coverage.

705 As long-recognized in archaeobotany, fine-mesh sifting enabled retrieval of a much wider  
706 range of plants. Without it, we would have entirely missed the presence of fig drupelets on  
707 site, let alone their high ubiquity. Evidence for crop processing, especially of cereals, derived  
708 exclusively from the fine sifting, as did the vast majority of wild/weed seeds. In addition, the  
709 subsampling strategy by mesh size proved highly effective in maximizing species retrieval  
710 and quantitative comparison between contexts. Sorting 100% of fine sift sediments at the 2  
711 mm+ mesh size enabled full recovery of all major domesticated species except figs.

712 Subsampling material retrieved from 1 mm and 0.5 mm sieves enabled a balance to be met  
713 between constraints and coverage of small finds. These sieve sizes produced the bulk of  
714 cereal rachis fragments, fig drupelets and remains of most identified wild/weed taxa.

715 Altogether, the above multi-pronged sifting strategy effectively maximized retrieval of plant  
716 remains and contributed to the high diversity of identified taxa. This, together with the focus  
717 on organically rich rubbish middens and a multi-site micro-regional approach produced a  
718 dataset that is relevant on a macro-regional and Holocene-wide scale.

719

720 *Seed identification*

721 Identifications were performed with reference to the Israel National Collection of Plant Seeds  
722 and Fruits at Bar-Ilan University. Cereal grain morphometry was employed to identify  
723 candidates, using the Computerized Key of Grass Grains developed by Mordechai Kislev's  
724 laboratory (Kislev et al. 1992; 1997; 1999). As aids to identification and analysis, local plant  
725 guides were consulted, particularly the *Flora Palaestina* (Zohary and Feinbrun-Dothan,  
726 1966–1986). Additional floras of Mediterranean, Irano-Turanian and Saharo-Arabian  
727 phytogeographic regions were consulted as needed (Townsend and Guest 1966–1985;  
728 Meikle, 1977, 1985; Zohary et al. 1980–1994; Feinbrun-Dothan et al. 1998; Turland, 1993;  
729 Boulos, 1999–2005; Davis, 1966–2001; Danin, 2004). To confirm identification, the jujuba  
730 (*Ziziphus jujuba*) endocarp was scanned using a micro-CT (Bruker desktop SkyScan 1174) at  
731 the Laboratory of Bone Biomechanics, Hebrew University of Jerusalem (Supplementary  
732 Videos 1-2).

733 Identification criteria for rare, domesticated plant specimens discussed in the main text are  
734 summarized below:

735 *Aubergine (Solanum melongena L.)*

736 *S. melongena* and other *Solanum* seeds are laterally compressed, broadly oval-shaped and  
737 under 5 mm in maximal length. *S. melongena* seeds are distinguished from wild *Solanum*  
738 seeds of the southern Levant by their larger size, reticulated seed coat pattern, and the wide  
739 ovoid hilum set in a recess in the seed's lateral outline (Van der Veen and Morales 2011: 93;  
740 Amichay and Weiss 2020: 679). This includes *S. incanum* L. which was identified at  
741 Byzantine Ein Gedi and is considered by some to be the wild progenitor of *S. melongena*  
742 (Melamed and Kislev 2005). The latter two criteria also distinguish *S. melongena* from  
743 domesticated *Capsicum* spp. Based on these criteria, we identified three definitive *S.*  
744 *melongena* seeds from Umayyad Shivta (Area E, Locus 504, Basket 5029). Poor preservation  
745 precludes definitive identification for an additional three fragmented seeds from Umayyad  
746 Nessana (Locus 102) for which *S. melongena* nonetheless appears to be the only candidate  
747 (SI Figure 1).

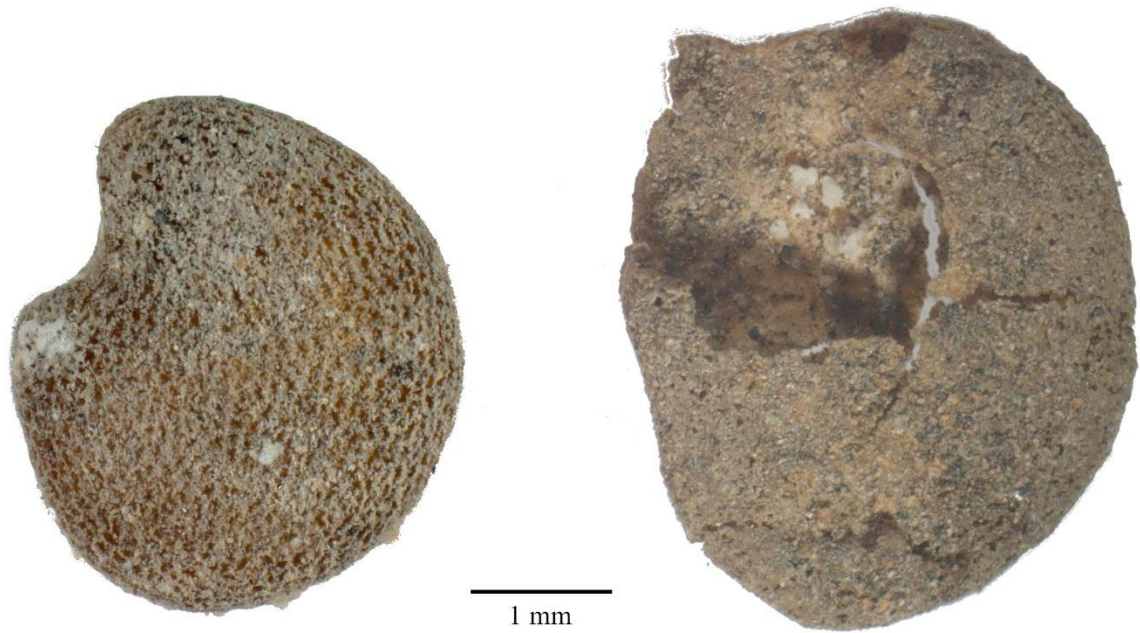

748

749 SI Figure 1. Left: *Solanum melongena* L. seed from Shivta (E 504-5029). Right: cf. *Solanum*  
750 *melongena* from Nessana (A 102-1072-1).

751

752 *Cherry/plum (Prunus subgen. Cerasus/Prunus)*

753 A single ovoid endocarp with a pointed apex, elliptical base (5 mm by 2.5 mm), and smooth  
754 surface was found in a course-sift sample from Umayyad Shivta (Area K1, Locus 165, Basket  
755 1652; SI Figure 2). Its length from apex to base is 12.67 mm, width 9.33 mm, and breadth  
756 7.67 mm. A ventral ridge runs down the length of the endocarp, from apex to base,  
757 accompanied by two ridges on either side and at equal distance from the central ridge.  
758 However, the right ventral ridge exists only on the top third of the endocarp while the left  
759 ventral ridge is visible in the top two thirds. The dorsal side is marked by a single  
760 longitudinal ridge. The above characteristics ruled out apricot, peach, and almond, and leave  
761 cherry and plum as candidates (*Prunus* subgen. *Cerasus/Prunus*). Due to the wide variety of  
762 plum and cherry cultivars (Depypere et al. 2007) not fully covered by the reference  
763 collection, we did not identify to species.

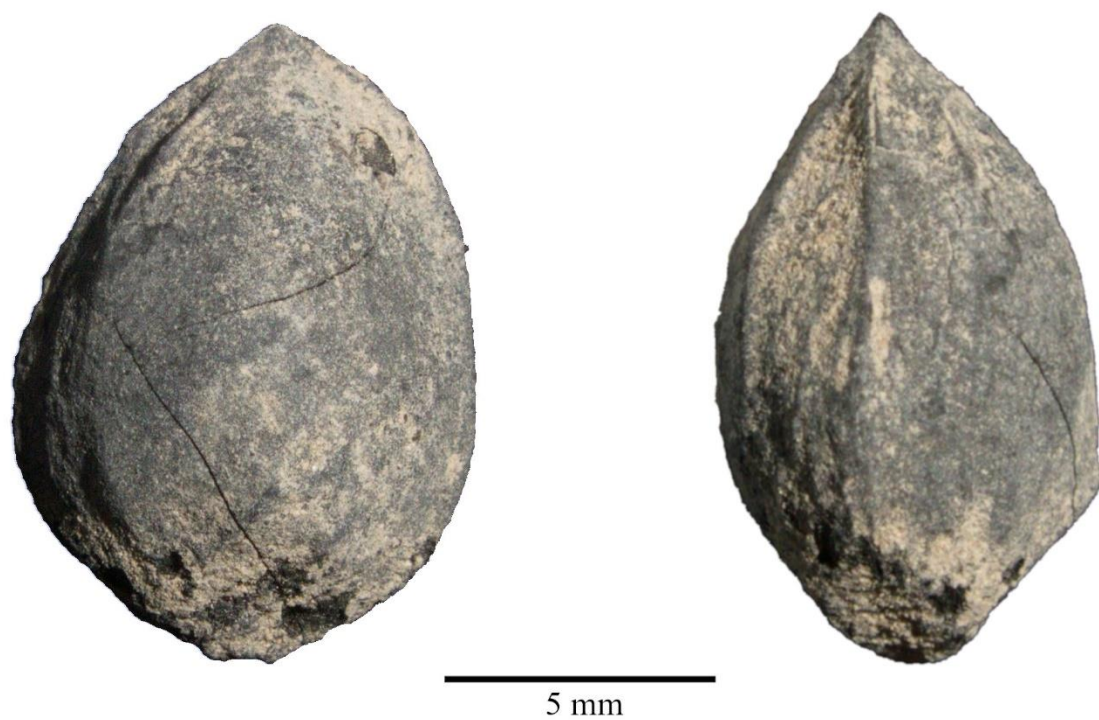

764

765

766 SI Figure 2. *Prunus* subgen. *Cerasus*/*Prunus* endocarp from Shivta (K1 165-1652)

767

768

769 *Jujuba* (*Ziziphus jujuba* Mill.)

770 A single charred obconical-mucronate endocarp was found from Umayyad-period layers  
771 from Shivta (Area E, Locus 501, Basket 5108). Micro-CT scanning (using a Bruker desktop  
772 SkyScan 1174), demonstrated it to be spherically hollow with remnants of a partition (see  
773 Supplementary Videos 1-2), confirming its status as a fruit endocarp. The external endocarp  
774 dimensions (11.16 mm x 6.0 mm x 5.33 mm) and obconical with markedly narrowing apex  
775 (SI Figure 3) are unique to certain varieties of *Ziziphus jujuba*. The specimen's pointed edges  
776 tapered slightly and the external grooves characteristic of *Z. jujuba* are barely recognizable,  
777 apparently the result of abrasion during or following charring. Remnants of the characteristic  
778 v-shaped basal scar between the two endocarp halves (Jiang et al. 2013, their Fig. 6) are  
779 barely visible, again likely due to abrasion. Species with similar endocarps include local wild  
780 types of *Ziziphus* (*Z. spina-christi*, *Z. lotus*, *Z. nummalaria*), however these are always  
781 spherical and never obconical-mucronate to the extent of *Z. jujuba* and the specimen at hand.

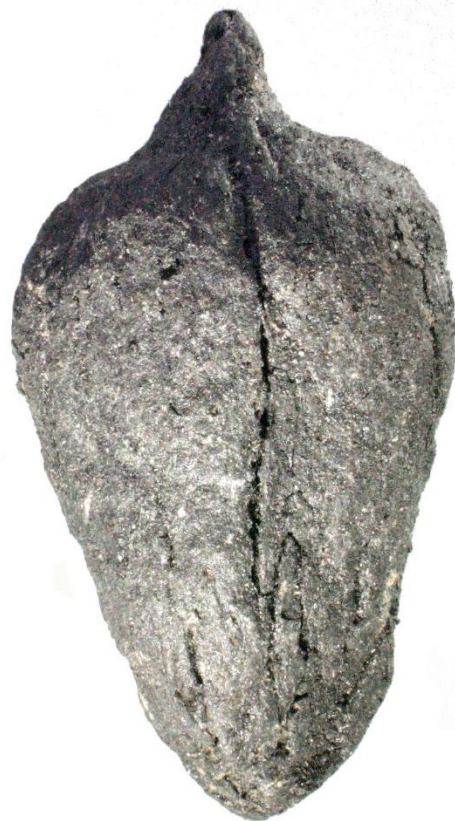

782

5 mm

783

SI Figure 3. *Ziziphus jujuba* Mill. endocarp from Shivta (E 501-5108)

784

785 *Nile acacia* (*Vachellia nilotica* (L.) P.J.H.Hurter & Mabb.)  
786 *Vachellia* (syn. *Acacia*) is a genus in the Mimosoideae subfamily of the Fabaceae. Seeds of  
787 Mimosoideae species native to the southern Levant are elliptical to ovate and compressed. On  
788 each face of the seedcoat a conspicuous pleurogram delimits an ovate areole (Gunn 1984; Al-  
789 Gohary and Mohamed 2007). The pleurogram may either be open-ended, i.e. U-  
790 shaped/horseshoe-shaped, or closed, concentric to the seed contour. To identify seeds with  
791 these traits found in the middens, we compared seeds of Mimosoideae species native to the  
792 southern Levant, based on samples in the Israel National Collection of Plant Seeds and Fruits:  
793 (i) *Vachellia nilotica* (L.) P.J.H.Hurter & Mabb.) syn. *Acacia nilotica* (L.) Willd. ex Delile;  
794 (ii) *Senegalia laeta* (R.Br. ex Benth.) Seigler & Ebinger syn. *Acacia laeta* R.Br. ex Benth.;  
795 (iii) *Acacia pachyceras* O. Schwartz; (iv) *Vachellia tortilis* subsp. *raddiana* (Savi) Kyal. &  
796 Boatwr. syn. *Acacia raddiana* Savi; (v) *Vachellia tortilis* (Forssk.) Galasso & Banfi syn.  
797 *Acacia tortilis* (Forssk.) Hayne; (vi) *Faidherbia albida* (Delile) A.Chev.; and (vii) *Prosopis*  
798 *farcta* (Banks & Sol.) J.F.Macbr. We observed that *V. nilotica* seeds are distinguished by the  
799 following characteristics:

- 800 1) The pleurogram's border (linea fissura) is closed, creating an ovate areole (SI Figure  
801 4).
- 802 2) The areole is largest, relative to seed size, in *V. nilotica*, i.e., the distance from the  
803 linea fissura to the seed edge is shortest in this species (SI Table 1).
- 804 3) The areole's widest part is in the top third of the seed (SI Table 1; SI Figure 4).
- 805 4) A protrusion is present next to the hilum which we observed to be unique to *V.*  
806 *nilotica* seeds among the above species.

807 *V. nilotica* seeds tend to be the largest of the above except for *P. farcta*, although interspecies  
808 diversity leads to size overlap between *V. nilotica*, *A. pachyceras* and *V. tortilis* subsp.  
809 *raddiana* (SI Table 1). *P. farcta* seeds are like *Vachellia* spp. seeds in shape but tend to be  
810 larger than most *Vachellia* seeds and more ovate to pear-shaped. Their pleurograms are  
811 visibly open. *V. nilotica* seeds were identified using a combination of criteria (1)-(4) above in  
812 midden samples from Elusa (Area A1, Locus 1/10a; A4, L. 4/06a-4/07a; SI Figure 4).  
813 Remains of *Vachellia* were identified also in other Negev Highland sites: One seed from  
814 Nessana (A, L. 125, B. 1446) was identified as *Vachellia* sp., while a single seed from Shivta  
815 (K1, L. 153, B. 1579) could only be identified as *Vachellia/Prosopis farcta* due to poor  
816 preservation.

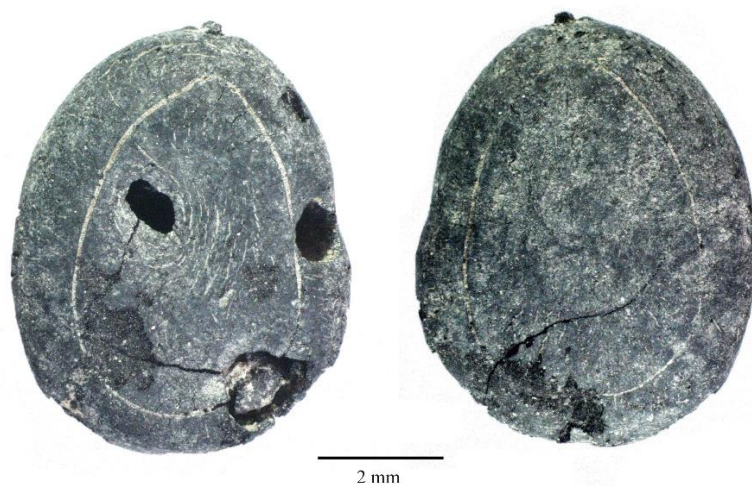

817

818 SI Figure 4. *Vachellia nilotica* (L.) Willd. ex Delile seed faces A and B from Elusa (A1/10a)

819

820 *SI Table 1. Some Acacia spp. seed measurements from the Israel National Collection of Plant*  
 821 *Seeds and Fruits*

| Species              | Population              | seed # | seed face (A/B) | seed length (mm) | seed width (mm) | areole length (mm) | areole width (mm) | (seed width-areole width)/seed width | (seed length-areole length)/seed length | max. areole width |
|----------------------|-------------------------|--------|-----------------|------------------|-----------------|--------------------|-------------------|--------------------------------------|-----------------------------------------|-------------------|
| <i>A. nilotica</i>   | Elusa A, archaeological | 1      | A               | 7.5              | 6.0             | 6.0                | 4.2               | 0.30                                 | 0.20                                    | a                 |
| <i>A. nilotica</i>   | Elusa A, archaeological | 1      | B               | 7.5              | 6.0             | 6.1                | 4.1               | 0.32                                 | 0.19                                    | a                 |
| <i>A. nilotica</i>   | Elusa B, archaeological | 2      | A               | 5.7              | 4.7             | 5.3                | 3.6               | 0.23                                 | 0.07                                    | a                 |
| <i>A. nilotica</i>   | Luxor 1981              | 3      | A               | 10.0             | 7.6             | 9.0                | 6.0               | 0.21                                 | 0.10                                    | a                 |
| <i>A. nilotica</i>   | Luxor 1981              | 3      | B               | 10.1             | 7.7             | 8.9                | 5.6               | 0.27                                 | 0.12                                    | a                 |
| <i>A. nilotica</i>   | Luxor 1981              | 4      | A               | 10.5             | 7.7             | 8.9                | 6.0               | 0.22                                 | 0.15                                    | a                 |
| <i>A. nilotica</i>   | Luxor 1981              | 4      | B               | 10.5             | 7.7             | 8.8                | 6.0               | 0.22                                 | 0.16                                    | a                 |
| <i>A. nilotica</i>   | Luxor 1981              | 5      | A               | 10.9             | 7.3             | 9.5                | 5.7               | 0.22                                 | 0.13                                    | a                 |
| <i>A. nilotica</i>   | Luxor 1981              | 5      | B               | 10.6             | 7.0             | 9.5                | 5.0               | 0.29                                 | 0.10                                    | a                 |
| <i>A. nilotica</i>   | Luxor 1981              | 6      | A               | 7.0              | 6.5             | 6.2                | 4.5               | 0.31                                 | 0.11                                    | a                 |
| <i>A. nilotica</i>   | Luxor 1981              | 6      | B               | 7.0              | 6.4             | 6.0                | 4.5               | 0.30                                 | 0.14                                    | a                 |
| <i>A. pachyceras</i> | Wadi Ram 26.2.95        | 7      | A               | 9.2              | 6.9             | 6.2                | 3.2               | 0.54                                 | 0.33                                    | c                 |
| <i>A. pachyceras</i> | Wadi Ram 26.2.95        | 7      | B               | 9.1              | 6.7             | 6.6                | 3.2               | 0.52                                 | 0.27                                    | c                 |
| <i>A. pachyceras</i> | Wadi Ram 26.2.95        | 8      | A               | 10.5             | 8.0             | 7.4                | 4.2               | 0.48                                 | 0.30                                    | a                 |
| <i>A. pachyceras</i> | Wadi Ram 26.2.95        | 8      | B               | 10.5             | 8.0             | 7.8                | 3.9               | 0.51                                 | 0.26                                    | a                 |
| <i>A. pachyceras</i> | Wadi Ram 26.2.95        | 9      | A               | 10.6             | 6.5             | 7.9                | 3.5               | 0.46                                 | 0.25                                    | b                 |
| <i>A. pachyceras</i> | Wadi Ram 26.2.95        | 9      | B               | 10.4             | 6.4             | 7.8                | 3.6               | 0.44                                 | 0.25                                    | b                 |
| <i>A. pachyceras</i> | Nahal Hayyun 15.3.71    | 10     | A               | 8.1              | 5.7             | 5.0                | 2.7               | 0.53                                 | 0.38                                    | a                 |
| <i>A. pachyceras</i> | Nahal Hayyun 15.3.72    | 10     | B               | 8.0              | 5.7             | 5.1                | 2.5               | 0.56                                 | 0.36                                    | a                 |
| <i>A. pachyceras</i> | Nahal Hayyun 15.3.73    | 11     | A               | 8.5              | 5.8             | 6.4                | 3.3               | 0.43                                 | 0.25                                    | b                 |
| <i>A. pachyceras</i> | Nahal Hayyun 15.3.74    | 11     | B               | 8.5              | 5.8             | 6.3                | 3.2               | 0.45                                 | 0.26                                    | b                 |
| <i>A. pachyceras</i> | Nahal Hayyun 15.3.75    | 12     | A               | 7.7              | 6.2             | 6.0                | 3.6               | 0.42                                 | 0.22                                    | b                 |
| <i>A. pachyceras</i> | Nahal Hayyun 15.3.76    | 12     | B               | 7.5              | 6.2             | 6.0                | 3.6               | 0.42                                 | 0.20                                    | b                 |
| <i>A. raddiana</i>   | Moje Awad               | 13     | A               | 7.9              | 5.8             | 5.4                | 3.5               | 0.40                                 | 0.32                                    | e                 |
| <i>A. raddiana</i>   | Moje Awad               | 13     | B               | 7.9              | 5.7             | 5.2                | 3.5               | 0.39                                 | 0.34                                    | e                 |
| <i>A. raddiana</i>   | Moje Awad               | 14     | A               | 9.7              | 6.5             | 7.0                | 3.8               | 0.42                                 | 0.28                                    | d                 |
| <i>A. raddiana</i>   | Moje Awad               | 14     | B               | 9.6              | 6.5             | 7.0                | 4.0               | 0.38                                 | 0.27                                    | c                 |
| <i>A. raddiana</i>   | Moje Awad               | 15     | A               | 8.1              | 5.9             | 5.5                | 3.8               | 0.36                                 | 0.32                                    | c                 |
| <i>A. raddiana</i>   | Moje Awad               | 15     | B               | 8.0              | 6.0             | 5.7                | 3.5               | 0.42                                 | 0.29                                    | c                 |
| <i>A. raddiana</i>   | Ein Gedi 19.5.1917      | 16     | A               | 8.0              | 5.5             | 5.9                | 3.5               | 0.36                                 | 0.26                                    | c                 |
| <i>A. raddiana</i>   | Ein Gedi 19.5.1917      | 16     | B               | 8.0              | 5.5             | 5.6                | 3.4               | 0.38                                 | 0.30                                    | c                 |
| <i>A. raddiana</i>   | Ein Gedi 19.5.1917      | 17     | A               | 8.0              | 5.3             | 5.9                | 3.5               | 0.34                                 | 0.26                                    | c                 |
| <i>A. raddiana</i>   | Ein Gedi 19.5.1917      | 17     | B               | 8.1              | 5.4             | 5.5                | 3.4               | 0.37                                 | 0.32                                    | c                 |
| <i>A. raddiana</i>   | Ein Gedi 19.5.1917      | 18     | A               | 8.0              | 5.4             | 5.9                | 3.5               | 0.35                                 | 0.26                                    | c                 |
| <i>A. raddiana</i>   | Ein Gedi 19.5.1917      | 18     | B               | 8.0              | 5.4             | 5.8                | 3.4               | 0.37                                 | 0.28                                    | c                 |

822 *Table uses Acacia as used in the reference accessions; for synonyms see text above. Max. areole width is based on distance from hilum: a )*  
 823 *upper third (from hilum); b) upper third-midway; c) midway; d) midway-lower third; e) lower third*

824



825 *Spanish vetchling (Lathyrus clymenum L.)*

826 Identification of *Lathyrus clymenum* was based on morphological similarity to ancient *L.*  
827 *clymenum* seeds identified from Tel Nami by Kislev (1993). Diagrams and measurements  
828 reported by Sarpaki and Jones (1990) for a large number of *L. clymenum* seeds from Late  
829 Bronze Age Akrotiri and Knossos were also used.

830 The following generalized description refers to the identified *L. clymenum* seeds from Shivta  
831 and Nessana: The seeds are laterally compressed, nearly rectangular circumstance. In lateral  
832 view, the radicle lies on the short side, perpendicular to the long side where the hilum lies (SI  
833 Figure 5). The radicle forms a somewhat planar face, especially by comparison with the other  
834 sides of the seed. The dorsal side (parallel to that on which the hilum lies), is conspicuously  
835 carinated, whereas the ventral side was only moderately carinated. The hilum occupies over  
836 half the length of the ventral side. It begins at one end of the ventral side (near the radicle)  
837 and ends just before the circular lens. The thin seed coat is neither perfectly smooth nor  
838 tuberculate but appears grainy at magnification of ca. 40X.

839 *L. clymenum* seeds were identified at Nessana, midden A (106-1255 cf. 106-1257; 101-1032)  
840 and several from midden K at Shivta (153-1588,1610; 158-1618; 166-1658; 169-1678,1703;  
841 172-1689). The positions, shapes and relative sizes of the hilum and lens matched those of  
842 the Tel Nami *L. clymenum* seeds and the depictions in Sarpaki and Jones (1990). The same is  
843 true for seed coat thickness and texture, as well as the markedly carinated dorsal side. One  
844 seed from Shivta (K1, 153-1588) measured below than the range of Tel Nami seed  
845 dimensions (SI Table 2). However, its relative dimensions and clear morphology justified  
846 unequivocal identification as *L. clymenum*.

847

848 *SI Table 2. Select L. clymenum seed measurements from Tel Nami*

| Seed | L (mm) | B (mm) | T (mm) | L/B  | L/T  |
|------|--------|--------|--------|------|------|
| 1    | 4.3    | 2.3    | 3.6    | 1.87 | 1.19 |
| 2    | 4.6    | 2.4    | 3.9    | 1.92 | 1.18 |
| 3    | 4.2    | 2.2    | 3.05   | 1.91 | 1.38 |
| 4    | 3.6    | 2.75   | 2.9    | 1.31 | 1.24 |
| 5    | 3.3    | 2.5    | 3.5    | 1.32 | 0.94 |
| mean | 4.00   | 2.43   | 3.39   | 1.66 | 1.19 |
| s.d. | 0.48   | 0.19   | 0.37   | 0.29 | 0.14 |

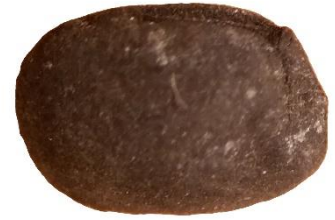

SI Figure 5. *Lathyrus clymenum* L.  
seed from Shivta, midden K.  
Length ca. 3.5 mm.

849

850 *White lupine (Lupinus albus L.)*

851 Three species of lupine (*Lupinus*) which grow today in the southern Levant are distinct for  
852 their large (ca. 1 cm), compressed quadrangular seeds: *L. palaestinus*, *L. pilosus*, and the  
853 cultivated *L. albus*. Viewed laterally, the seeds of these species have a near-circular, or D-  
854 shaped outline and, frequently, a visible depression or dimple. The triangular radicle forms  
855 the perimeter's straightest side, while the hilum leads from the radicle tip toward the lens at  
856 an angle such that the lens and radicle are on perpendicular sides with the hilum cutting  
857 across between the two. The lens is nearly as large as the hilum and both are elliptic. The  
858 seed coat surrounds the hilum by a characteristic elliptical protrusion. Throughout, the seed  
859 coat consists of at least two layers visibly distinct in cross-section, with the outer layer having  
860 a smooth surface and the inner layer having a grainy surface. As is common among  
861 domesticated legumes in general, the seed coat of cultivated *L. albus* is much thinner than its  
862 local wild relatives. An additional feature distinguishing *L. albus* seeds from *L.*  
863 *palaestinus/pilosus* is the presence of a clear transverse ridge separating the radicle  
864 depression and the hilum on the seed surface. In *L. palaestinus/pilosus*, by contrast, the  
865 radicle depression and hilum are essentially contiguous, running smoothly one into the other.

866 Three candidates for lupine seeds were identified among course-sifted archaeobotanical  
867 remains from Nessana (Area A, Locus 101, Baskets 1008/1 and 1040/2). The single seed  
868 from Basket 1040 (SI Figure 6) is compressed with a lateral depression and a near-circular  
869 quadrangle in outline measuring 70 x 75 mm. Remains of a triangular radicle on the seed's

870 straight side are clearly visible. These features narrowed its identification to one of the three  
871 aforementioned *Lupinus* species. Both lens and hilum are visible; their shape and orientation  
872 match those of *Lupinus* seeds. A slight but clear protrusion separating the hilum from the  
873 radicle depression warrant identification as *Lupinus albus*. Remnants of a thin and grainy  
874 seed coat are visible in the center of the cotyleda's surface, in the middle of the lateral  
875 depression.

876 Two additional seeds from Basket 1008/1 show characteristic lupine (*Lupinus* sp.) hila and  
877 radicle. The seeds measure 65 x 70 mm and 75 x 80 mm which, together with their D-shaped  
878 outlines, corresponds with that typical to the large lenticular lupine species mentioned above.  
879 The two seeds from basket 1008/1 are broader than the *L. albus* seed from Basket 1040/2, and  
880 the characteristic lateral depression is not visible. This is apparently due to lateral swelling  
881 and partial disfiguration during charring as is common in charred legume seeds. In the larger  
882 of the two seeds, a thin, grainy seed coat is visible surrounding the triangular radicle and  
883 covering one of the cotyleda. In that same seed, a topographic separation between the radicle  
884 depression and hilum justifies identification as *L. albus*.

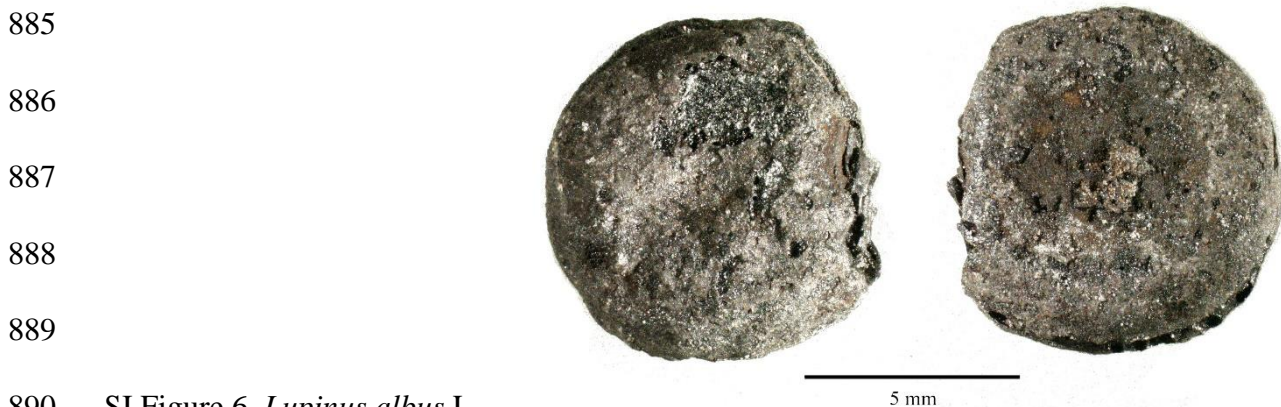

890 SI Figure 6. *Lupinus albus* L.

891 seed faces A and B from Nessana (A 101-1040/2)

892

### 893 *Radiocarbon dating*

894 Periodization of the studied assemblages followed those used by Fuks et al. (2020), based on  
895 ceramic typologies and previous radiocarbon dates (Bar-Oz et al. 2019). In this study we  
896 dated the loci-baskets containing unprecedented finds for southern Levantine archaeobotany,  
897 as well as the locus containing well-preserved aubergine seeds in Shivta. The aubergine,  
898 lupin and jujuba seeds were too rare to sacrifice for direct radiocarbon so barley grains were  
899 selected from the very same sediment sample within each locus-basket. Radiocarbon dating

900 was performed by the Poznan Radiocarbon Laboratory, and calibration was made with the  
901 OxCal v4.4.2 (Bronk Ramsey 2020), using atmospheric data from Reimer et al (2020). All  
902 dates reflect assemblages from the Early Islamic period (Table 4).

903 Although the calibrated ranges vary, the sample containing aubergine (*S. melongena*) falls  
904 within the Abbasid period at the 95% confidence level; samples containing white lupin (*L.*  
905 *albus*) and jujuba (*Z. jujuba*) are either Umayyad or from the early Abbasid period (mid-7<sup>th</sup> –  
906 late 8<sup>th</sup> c. cal. CE).

907

#### 908 *Micro-CT scanning*

909 Micro-CT scans on the *Z. jujuba* endocarp were conducted by Senthil Ram Prabhu  
910 Thangadurai at the Laboratory of Bone Biomechanics, Hebrew University of Jerusalem.  
911 Optical resolution (pixel size): 9.6 µm; exposure: 4500 ms; rotation step: 0.400 degrees; 180  
912 degree rotation option was used; 0.25 mm thick aluminium filter. The scans confirmed  
913 identification as an endocarp by revealing its hollow inner structure and partition. For full  
914 identification criteria see above. The following scanning files are attached to this article:

915 *SI Video 1* – Micro-CT longitudinal scans of *Z. jujuba* endocarp.

916 *SI Video 2* – Micro-CT lateral scans of *Z. jujuba* endocarp.

917

#### 918 *References to Supplementary Information*

919 Al-Gohary, I.H. and Mohamed, A.H. (2007). Seed morphology of Acacia in Egypt and its  
920 taxonomic significance. *International Journal of Agriculture and Biology* 9(3): 435–438.

921 Amichay, O. and Weiss, E. (2020). Chapter 18: The archaeobotanical remains. In: Ben-Ami,  
922 D. and Tchekhanovets, Y. *Jerusalem: Excavations in the Tyropoeon Valley (Giv'ati Parking*  
923 *Lot). Volume II, The Byzantine and Early Islamic Periods* (pp. 645–701). IAA Reports, no.  
924 66/2. Jerusalem: Israel Antiquities Authority.

925 Bar-Oz G. et al. (2019). Ancient trash mounds unravel urban collapse a century before the  
926 end of Byzantine hegemony in the southern Levant. *Proceedings of the National Academy of*  
927 *Sciences, USA* 116(17): 8239–8248.

928 Boulos, L. (1999–2005). *Flora of Egypt*. Vols. 1–4. Cairo: Al Hadara.

929 Danin, A. (2004). *Distribution atlas of plants in the Flora Palaestina area*. Jerusalem: Israel  
930 Academy of Sciences and Humanities.

931 Davis, P.H. (1966–2001). *Flora of Turkey*. Vols. 1–11. Edinburgh: Edinburgh University  
932 Press.

- 933 Depypere, L., Chaerle, P., Mijnsbrugge, K.V. and Goetghebeur, P. (2007). Stony endocarp  
934 dimension and shape variation in Prunus section Prunus. *Annals of Botany*, 100(7): 1585–  
935 1597
- 936 Dunseth, Z.C., Fuks, D., Langgut, D., Weiss, E., Melamed, Y., Butler, D.H., Yan, X.,  
937 Boaretto, E., Tepper, Y., Bar-Oz, G. and Shahack-Gross, R. (2019). Archaeobotanical proxies  
938 and archaeological interpretation: A comparative study of phytoliths, pollen and seeds in  
939 dung pellets and refuse deposits at Early Islamic Shivta, Negev, Israel. *Quaternary Science*  
940 *Reviews* 211: 166–185.
- 941 Feinbrun-Dothan, N. and Danin, A. (1991). *Analytical flora of Eretz*  
942 *Israel* (Hebrew). Jerusalem: Cana.
- 943 Fuks, D., Bar-Oz, G., Tepper, Y., Erickson-Gini, T., Langgut, D., Weissbrod, L. and Weiss,  
944 E. (2020). The rise and fall of viticulture in the Negev Highlands during Late Antiquity: an  
945 economic reconstruction from quantitative archaeobotanical and ceramic data. *Proceedings of*  
946 *the National Academy of Sciences, USA* 117 (33): 19780–19791.
- 947 Gunn, C.R. (1984). *Fruits and seeds of genera in the subfamily Mimosoideae (Fabaceae)*.  
948 U.S. Department of Agriculture, Technical Bulletin No. 1681.
- 949 Jiang, H., Yang, J., Ferguson, D., Li, Y., Wang, C.S., Li, C.S. and Liu, C. (2013). Fruit stones  
950 from Tiao Lei's tomb of Jiangxi in China, and their palaeoethnobotanical  
951 significance. *Journal of Archaeological Science* 40(4): 1911–1917.
- 952 Kislev, M.E., Artzy, M. and Marcus, E. (1993). Import of an Aegean food plant to a Middle  
953 Bronze IIA coastal site in Israel. *Levant* 25(1): 145–154.
- 954 Kislev, M.E., Simchoni, O., Melamed, Y., Marmorstein, M. (1995). Computerized key for  
955 grass grains of Israel and its adjacent regions. In: Kroll, H. and Pasternak, R., (eds.), *Res*  
956 *archaeobotanicae: International Workgroup for Palaeoethnobotany – Proceedings of the 9th*  
957 *symposium* (pp. 69–79). Kiel: Oetker-Voges.
- 958 Kislev, M.E., Melamed, Y., Simchoni, O. and Marmorstein, M. (1997). Computerized key of  
959 grass grains of the Mediterranean basin. *Lagascalia* 19(1–2): 289–294.
- 960 Kislev, M.E., Melamed, Y., Simchoni, O. and Marmorstein, M. (1999). Computerized keys  
961 for archaeological grains: first steps. In: Pike, S. and Gitin, S. (eds.), *The Practical Impact of*  
962 *Science on Near Eastern and Aegean Archaeology* (pp. 29–31). Athens: Archetype.
- 963 Kroll, H. (2005). Literature on archaeological remains of cultivated plants 1981–2004. URL:  
964 <http://www.archaeobotany.de/database.html>
- 965 Meikle, R.D. (1977–1985). *Flora of Cyprus*. Vols. 1–2. London: Royal Botanic Gardens,  
966 Kew.
- 967 Melamed, Y. and Kislev, M. (2005). Remains of seeds, fruits and insects from the  
968 excavations in the village of 'En Gedi (Hebrew). *'Atiqot* 49: 139–140.
- 969 Núñez D.R., Séiquer, M.G., de Castro, C.O., Ariza, F.A. (2011). Plants and humans in the  
970 Near East and the Caucasus: ancient and traditional uses of plants as food and medicine, a  
971 diachronic ethnobotanical review (Armenia, Azerbaijan, Georgia, Iran, Iraq, Lebanon, Syria,  
972 and Turkey), vols. 1–2. Murcia: Editum.
- 973 Riehl, S. and Kümmel, C. (2005). Archaeobotanical database of Eastern Mediterranean and  
974 Near Eastern sites. <http://www.cuminum.de/archaeobotany/>
- 975 Sarpaki, A. and Jones, G. (1990). Ancient and modern cultivation of *Lathyrus clymenum* L.  
976 in the Greek islands. *Annual of the British School at Athens* 85: 363–368.

- 977 Townsend, C.C. and Guest, E. (1966–1985). *Flora of Iraq*. Baghdad: Ministry of Agriculture  
978 of the Republic of Iraq.
- 979 Turland, N.J., Chilton, L. and Press, J.R. (1995). *Flora of the Cretan area: annotated*  
980 *checklist and atlas*. London: Natural History Museum.
- 981 Van der Veen, M. and Morales, J. (2011). Chapter 3: Summer crops — from trade to  
982 innovation. In: Van der Veen, M., *Consumption, trade and innovation: exploring the*  
983 *botanical remains from the Roman and Islamic ports at Quseir al-Qadim, Egypt* (pp. 75–  
984 119). Frankfurt: Africa Magna Verlag.
- 985 Zohary, M. and Feinbrun-Dotan, N. (1966–1986). *Flora Palaestina*. Vols. 1–4. Jerusalem:  
986 Israel Academy of Sciences and Humanities.
- 987 Zohary, M., Heyn, C.C. and Heller, D. (1980–1994). *Conspectus Florae Orientalis: an*  
988 *annotated catalogue of the flora of the Middle East*. Fasc. 1–9. Jerusalem: Israel Academy of  
989 Sciences and Humanities.
